# Supplementary material
Source: publisher figshare collection journal article supplement (https://acs.figshare.com/ndownloader/files/38946482)
Supplement: Supplementary file 1 [file 38946482]

## Supplementary Note for:

### Scribe: next generation library searching for DDA experiments

Brian C. Searle<sup>1, 2, 3, 4 \*</sup>, Ariana E. Shannon<sup>1, 2, 3</sup>, and Damien Beau Wilburn<sup>1, 2, 3</sup>

<sup>1</sup>Department of Biomedical Informatics, The Ohio State University Medical Center, Columbus, Ohio 43210, United States.

<sup>2</sup>Department of Chemistry and Biochemistry, The Ohio State University, Columbus, Ohio 43210, United States.

<sup>3</sup>Pelotonia Institute for Immuno-Oncology, The Ohio State University Comprehensive Cancer Center, Columbus, Ohio 43210, United States.

<sup>4</sup>Proteome Software Inc., Portland, OR

\*Corresponding Address: Brian C. Searle, Ph.D., [brian.searle@osumc.edu](mailto:brian.searle@osumc.edu)

# Peptide detection with Scribe

**Tutorials based on Scribe version 2.11.2, last update on December 22, 2022**

Written by Ariana Shannon ([shannon.225@buckeyemail.osu.edu](mailto:shannon.225@buckeyemail.osu.edu)) and Brian Searle ([brian.searle@osumc.edu](mailto:brian.searle@osumc.edu))

Spectrum library searching is a powerful alternative to database searching for data dependent acquisition (DDA) experiments. Scribe is a new library search engine designed to leverage deep learning fragmentation prediction software such as Prosit. Scribe embeds Percolator for false discovery rate (FDR) correction and an interference-tolerant label-free quantification integrator to enable an end-to-end proteomics workflow.

## TABLE OF CONTENTS

|                                                            |           |
|------------------------------------------------------------|-----------|
| <b>OVERVIEW</b>                                            | <b>2</b>  |
| <b>1. PREREQUISITES AND INSTALLING SCRIBE</b>              | <b>3</b>  |
| <b>2. GENERATING MZMLS</b>                                 | <b>4</b>  |
| <b>3. GENERATING LIBRARIES USING PROSIT AND SCRIBE</b>     | <b>8</b>  |
| <b>4. SCRIBE SEARCH OPTIONS</b>                            | <b>15</b> |
| <b>5. INTERPRETATION OF SCRIBE OUTPUTS</b>                 | <b>18</b> |
| <b>6. VISUALIZING DATA WITH BUILT-IN FEATURES</b>          | <b>21</b> |
| <b>7. WALKTHROUGH WITH DEMO DATA</b>                       | <b>40</b> |
| <b>8. USING SCRIBE TO BUILD LIBRARIES FOR DIA SEARCHES</b> | <b>43</b> |
| <b>9. FAQ</b>                                              | <b>46</b> |

# OVERVIEW

Scribe comes with a user-friendly GUI interface. The upper left pane contains search options, while the right pane contains a process queue. The bottom left contains a console that provides specific information about the process EncyclopeDIA is running.

EncyclopeDIA: Peptide Searching for DIA

File View Convert Data Help

EncyclopeDIA Thesaurus Walnut Scribe



**Scribe: Spectrum-Centric Library Searching for Data-Dependent Acquisition (DDA) MS/MS Data**

Scribe extracts peptide fragmentation spectra from MZML files, matches them to spectra in libraries, and calculates various scoring features. These features are interpreted by Percolator to identify peptides.

Parameters:

Library: uniprot\_human-reference\_reviewed\_2022mar02.prosit\_input.trypsin\_nce29\_hcd2020.dlib

Edit

Background: uniprot\_human-reference\_reviewed\_2022mar02.fasta

Edit

Target/Decoy Approach: Normal Target/Decoy

▼

Enzyme: Trypsin

▼

Fragmentation: CID/HCD (B/Y)

▼

Precursor Mass Tolerance: 10.0 PPM

▼

Fragment Mass Tolerance: 10.0 PPM

▼

Library Mass Tolerance: 10.0 PPM

▼

Percolator Version: v3-01

▼

Number of Quantitative Ions: 5

▲▼

Minimum Number of Quantitative Ions: 3

▲▼

Number of Cores: 15

▲▼

Additional Command Line Options:

Processing precursors scans...

Found 229 total ranges

Preparing to maintain at most 26 jobs for 17 threads...

Constructing writer for D:\Ariana\2022\_09\_01\_HeLa\_500ng\_16mzst\_DDA\_NCE\_27.mzML.scribe.features.txt.unsorted

Working on 411.2 to 411.7 m/z (732 MS/MS, 12728 total entries). Jobs in waiting: 212

Working on 412.7 to 414.2 m/z (1011 MS/MS, 17921 total entries). Jobs in waiting: 212

Working on 414.2 to 414.8 m/z (812 MS/MS, 11974 total entries). Jobs in waiting: 212

Working on 414.8 to 415.2 m/z (843 MS/MS, 9886 total entries). Jobs in waiting: 212

Working on 411.7 to 412.7 m/z (911 MS/MS, 14320 total entries). Jobs in waiting: 212

Working on 408.8 to 408.9 m/z (697 MS/MS, 8850 total entries). Jobs in waiting: 212

Working on 407.3 to 407.3 m/z (554 MS/MS, 7856 total entries). Jobs in waiting: 212

Working on 403.4 to 403.7 m/z (711 MS/MS, 10328 total entries). Jobs in waiting: 212

Working on 415.6 to 416.2 m/z (841 MS/MS, 13106 total entries). Jobs in waiting: 212

Working on 415.2 to 415.6 m/z (846 MS/MS, 12402 total entries). Jobs in waiting: 212

Working on 407.3 to 408.8 m/z (1173 MS/MS, 19034 total entries). Jobs in waiting: 212

Working on 416.2 to 416.7 m/z (780 MS/MS, 13903 total entries). Jobs in waiting: 212

Working on 406.2 to 407.3 m/z (898 MS/MS, 16944 total entries). Jobs in waiting: 212

Working on 408.9 to 411.2 m/z (1532 MS/MS, 23959 total entries). Jobs in waiting: 212

Working on 403.7 to 406.2 m/z (1447 MS/MS, 23421 total entries). Jobs in waiting: 212

Working on 401.2 to 403.4 m/z (1475 MS/MS, 25163 total entries). Jobs in waiting: 212

1181 of 7266 MB used

Jobs:

Add MZML Save Chromatogram Library Save Quant Reports Save BLIB

File

Progress

Read 2022\_09\_01\_HeLa\_500ng\_16mzst\_DDA\_NCE\_27.mzML

415.2 to 416.7 m/z (780 MS/MS, 13903 total entries). Jobs in w

This manual outlines how to use Scribe, what outputs are given by Scribe, and how to use the outputs to interpret data.

Scribe Manual 2

# 1. PREREQUISITES AND INSTALLING SCRIBE

Software requirements needed to process data using Scribe.

Scribe is a cross-platform Java application that has been tested for Windows, Macintosh, and Linux. Scribe requires 64-bit Java 1.8. While it is possible to use higher versions of Java, many versions are untested. Using untested versions of Java may result in unknown errors. In particular, Java versions 17 and 18 are known to cause stability issues in the current release.

A. If you don't already have Java, install Java 1.8 on your computer. If you are using Windows, you can download the Windows "x64 Installer" from: <https://www.oracle.com/java/technologies/downloads/#java8>. Other operating system options are available at this URL as well.

B. Scribe is folded into the EncyclopeDIA software package. After you have 64-bit Java 1.8, go to EncyclopeDIA's bitbucket page (<https://bitbucket.org/searleb/encyclopedia/wiki/Home>) and download the most recent stable version. Once downloaded, double-click on the EncyclopeDIA .JAR file to launch the GUI interface. If you are using a Macintosh, you may need to right-click on the EncyclopeDIA .JAR and select "Open" to execute it for the first time with the proper permissions. Click on the tab named Scribe at the top to search DDA data.

C. We recommend using Proteowizard to create mzML files from your RAW files. You can freely download Proteowizard from here: <https://proteowizard.sourceforge.io/download.html>.

## 2. GENERATING MZMLS

How to use Proteowizard to generate vendor-neutral .mzML files from vendor-specific RAW files.

A. Before searching files in Scribe, RAW files must be converted to .mzML files using Proteowizard. To do so, open Proteowizard. Remove the “titleMakers” filter by selecting the filter in the parameters box, and clicking remove.

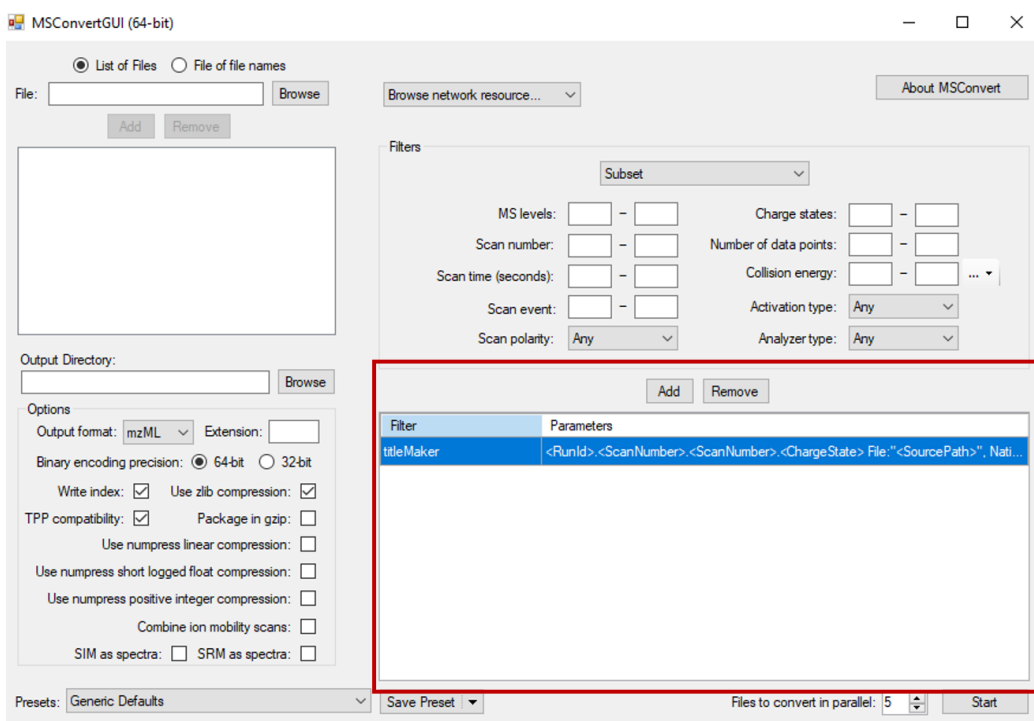

B. Add “Peak Picking” by selecting the peak picking option under filters, then click add. This should be the only filter in the box.

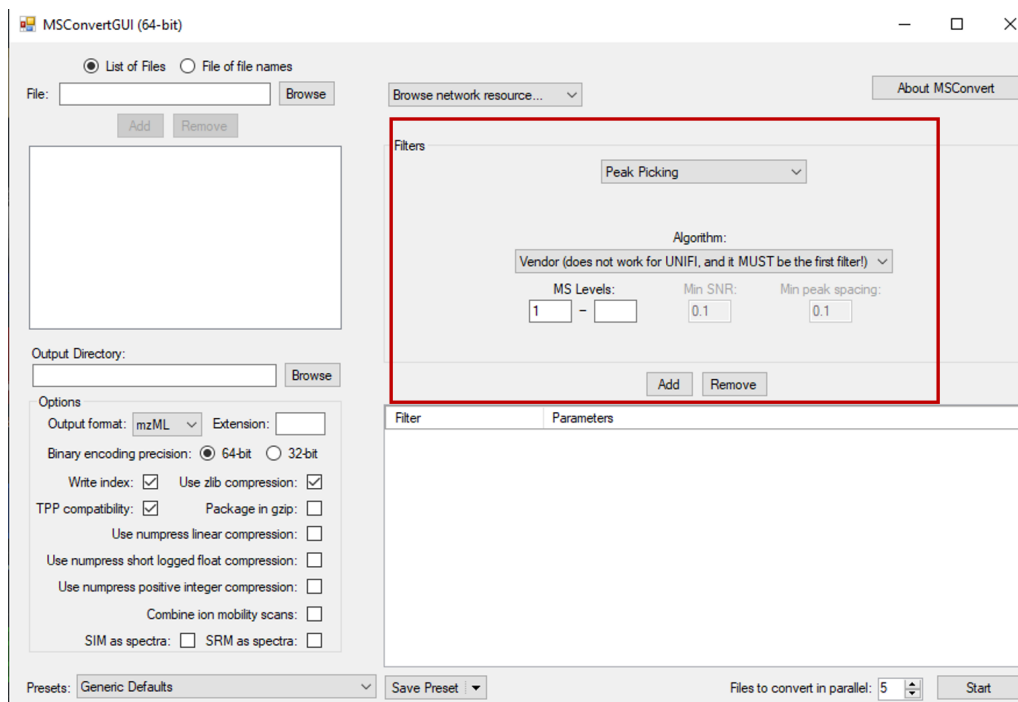



C. Select your files by clicking “browse”, and locate the desired DDA files in your directory. Click “add” on the left-hand side of the screen. The output directory will automatically populate where your files were selected from.

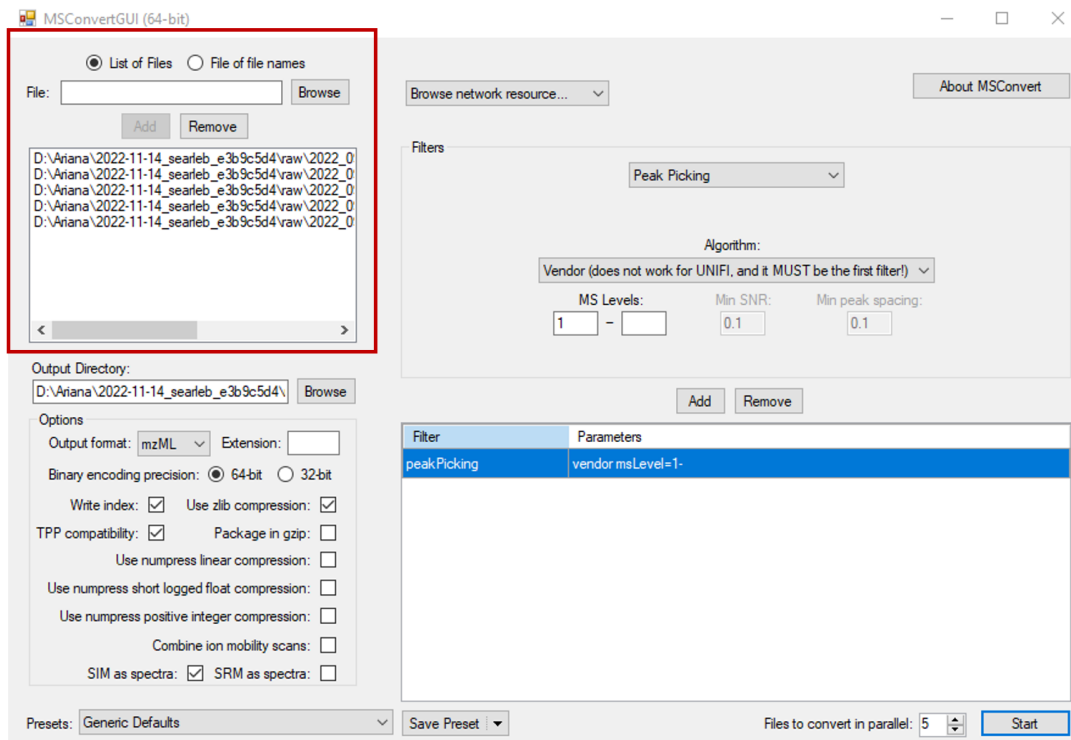

D. Under the options box, the output format should be mzML. You want “write index,” “use zlib compression,” “TPP compatibility, and “SIM as spectra” selected. Your settings should match the screenshot below.

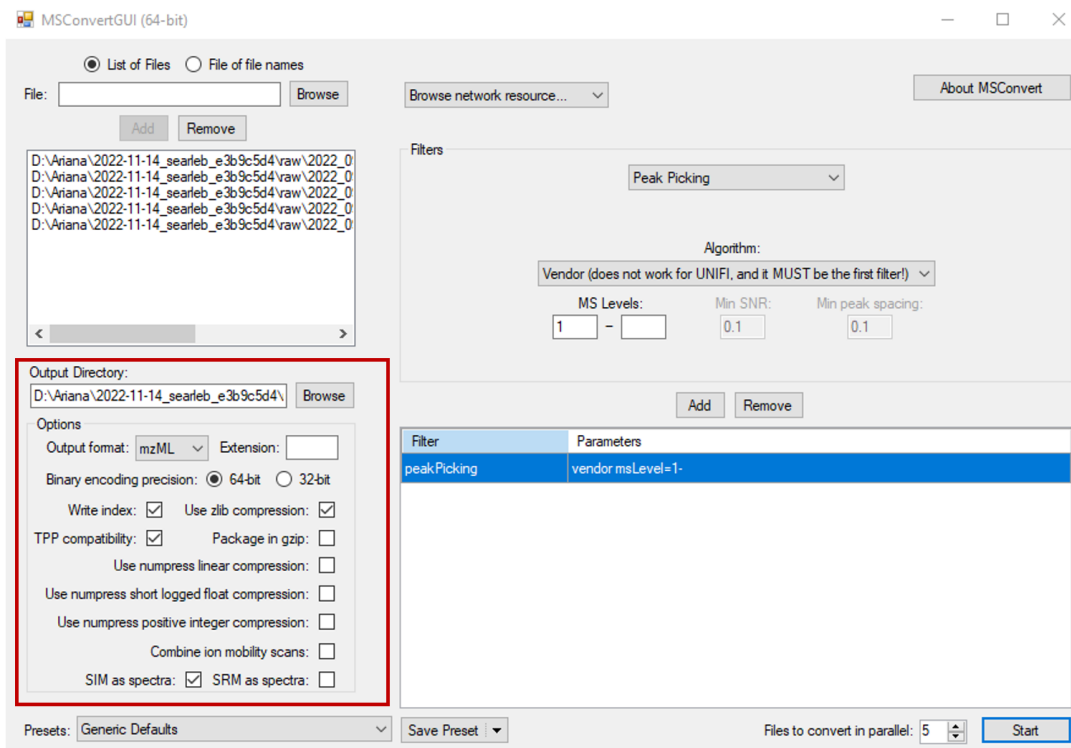

E. Click “Start” in the lower right hand corner to start the file conversion.

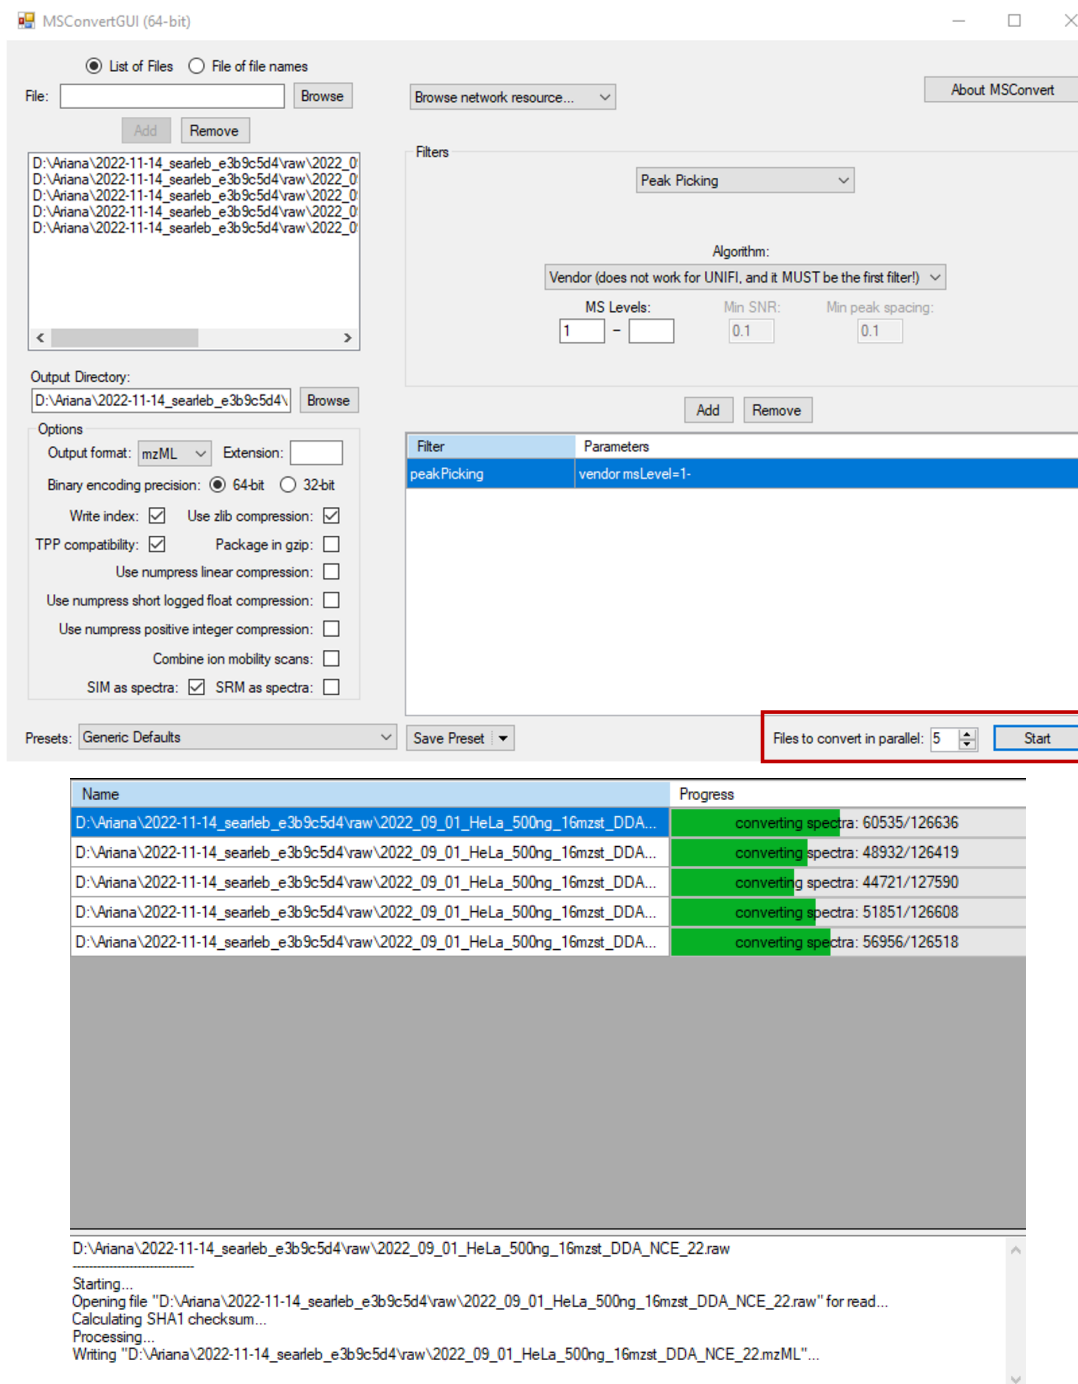

F. Once complete, the window will look like this. You can exit out of MSConvert once the conversion is done. Your files will be in the location previously specified.

— ☐ ☒ ☐

| Name                                                                         | Progress |
|------------------------------------------------------------------------------|----------|
| D:\Ariana\2022-11-14_searleb_e3b9c5d4\vw\2022_09_01_HeLa_500ng_16mzst_DDA... | Finished |

D:\Ariana\2022-11-14\_searleb\_e3b9c5d4\raw\2022\_09\_01\_HeLa\_500ng\_16mzst\_DDA\_NCE\_42.raw

Starting...

Opening file "D:\Ariana\2022-11-14\_searle\_b\_e3b9c5d4\raw\2022\_09\_01\_HeLa\_500ng\_16mzst\_DDA\_NCE\_42.raw" for read...

Calculating SHA1 checksum...

Processing...

Writing "D:\Ariana\2022-11-14\_searle\_b\_e3b9c5d4\raw\2022\_09\_01\_HeLa\_500ng\_16mzst\_DDA\_NCE\_42.mzML"...

Finished.

### 3. GENERATING LIBRARIES USING PROSIT AND SCRIBE

How to acquire a FASTA file and then use Prosit and Scribe to generate a spectral library file from it.

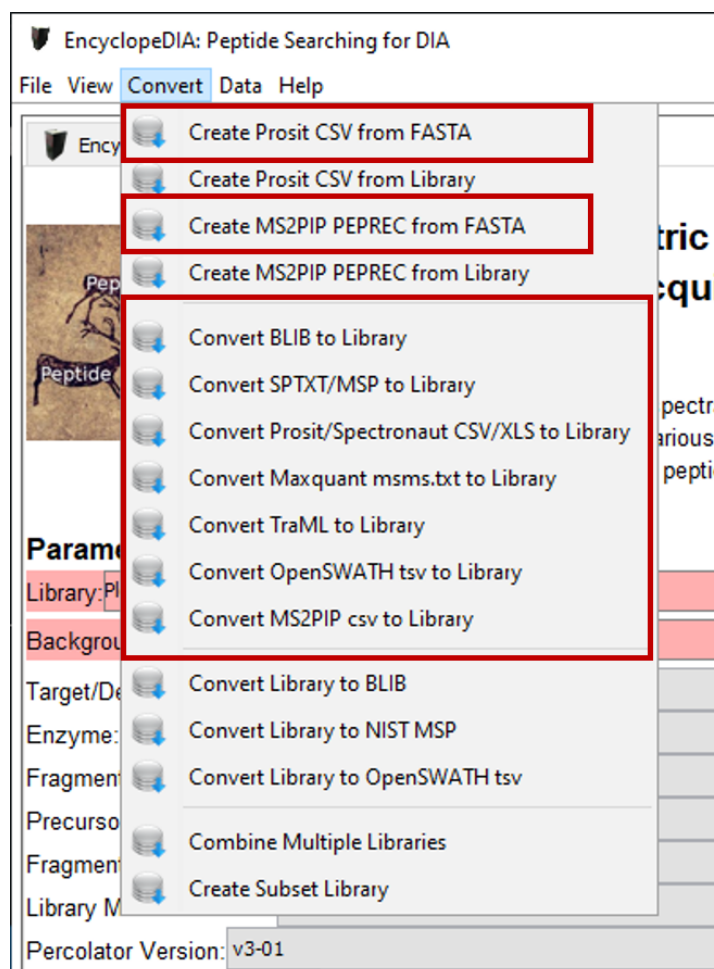

The primary library format Scribe uses is .DLIB. Spectrum libraries from Skyline, NIST, TraML and other formats can be converted to .DLIB using the “Convert” menu. In particular, Scribe can search fully predicted libraries generated by either Prosit or MS2PIP, and produce input files for both of those tools. The following tutorial is given on how to obtain a FASTA file and use Prosit to generate a predicted .DLIB.

A. To generate a Prosit-predicted spectral library (.DLIB) for Scribe, start by obtaining a FASTA file for your organism of interest. Given the computational expense of generating libraries, in most cases we recommend using only canonical protein sequences. For example, if you require a FASTA of proteins sequences for Homo Sapiens, go to uniprot.org. Select “Reviewed.”

← → ↺ uniprot.org

UniProt

BLASTAlignPeptide searchID mappingSPARQL

Find your protein

UniProtKB

Advanced | List

Search

Examples: Insulin, APP, Human, P05067, organism\_id:9606

UniProt is the world's leading high-quality, comprehensive and freely accessible resource of protein sequence and functional information. [Cite UniProt](#)

Proteins

UniProt Knowledgebase

Reviewed

(Swiss-Prot)

568,363

Unreviewed

(TrEMBL)

229,928,140

Species

Proteomes

Protein sets for species with sequenced genomes from across the tree of life

Protein Clusters

UniRef

Clusters of protein sequences at 100%, 90% & 50% identity

Sequence Archive

UniParc

Non-redundant archive of publicly available protein sequences seen across different databases

Specify “Human (20,401).”

Status

Reviewed (Swiss-Prot) (20,401)

Popular organisms

Human (20,401)

Taxonomy

Filter by taxonomy

Proteins with

3D structure (7,557)

Active site (2,278)

Activity regulation (1,527)

Allergen (6)

Alternative products (isoforms) (10,634)

More items

Protein existence

Protein level (16,585)

Transcript level (2,310)

Homology (754)

Uncertain (613)

Predicted (139)

Annotation score

5 (14,308)

UniProtKB 20,401 results

BLASTAlignMap IDsDownloadAddView: CardsTableCustomize columnsShare

| Entry      | Entry Name  | Protein Names                                            | Gene Names                     | Organism             | Length   |
|------------|-------------|----------------------------------------------------------|--------------------------------|----------------------|----------|
| A0A0C5B5G6 | MOTSC_HUMAN | Mitochondrial-derived peptide MOTS-c[...]                | MT-RNR1                        | Homo sapiens (Human) | 16 AA    |
| A0A1B0GTW7 | CIROP_HUMAN | Ciliated left-right organizer metalloproteinase[...]     | CIROP, LMLN2                   | Homo sapiens (Human) | 788 AA   |
| A0JNW5     | UH1BL_HUMAN | UHRF1-binding protein 1-like[...]                        | UHRF1BP1L, KIAA0701, SHIP164   | Homo sapiens (Human) | 1,464 AA |
| A0JP26     | POTB3_HUMAN | POTE ankyrin domain family member B3                     | POTEB3                         | Homo sapiens (Human) | 581 AA   |
| A0PK11     | CLRN2_HUMAN | Clarin-2                                                 | CLRN2                          | Homo sapiens (Human) | 232 AA   |
| A1A4S6     | RHG10_HUMAN | Rho GTPase-activating protein 10[...]                    | ARHGAP10, GRAF2                | Homo sapiens (Human) | 786 AA   |
| A1A519     | F170A_HUMAN | Protein FAM170A[...]                                     | FAM170A, ZNFD                  | Homo sapiens (Human) | 330 AA   |
| A1L190     | SYCE3_HUMAN | Synaptonemal complex central element protein 3[...]      | SYCE3, C22orf41, THEG2         | Homo sapiens (Human) | 88 AA    |
| A1L3X0     | ELOV7_HUMAN | Elongation of very long chain fatty acids protein 7[...] | ELOVL7                         | Homo sapiens (Human) | 281 AA   |
| A1X283     | SPD2B_HUMAN | SH3 and PX domain-containing protein 2B[...]             | SH3PX2B, FAD49, KIAA1295, TKS4 | Homo sapiens (Human) | 911 AA   |
| A2A2Y4     | FRMD3_HUMAN | FERM domain-containing protein 3[...]                    | FRMD3, EPB41L4O                | Homo sapiens (Human) | 597 AA   |
| A2RU14     | TM218_HUMAN | Transmembrane protein 218                                | TMEM218                        | Homo sapiens (Human) | 115 AA   |
| A2RUB6     | CCD66_HUMAN | Coiled-coil domain-containing protein 66                 | CCDC66                         | Homo sapiens (Human) | 948 AA   |
| A2RUC4     | TYW5_HUMAN  | tRNA tryptophan-synthetizing protein 5[...]              | TYW5, C2orf60                  | Homo sapiens (Human) | 315 AA   |
| A4D1B5     | GSAP_HUMAN  | Gamma-secretase-activating protein[...]                  | GSAP, PION                     | Homo sapiens (Human) | 854 AA   |
| A4GXA9     | EME2_HUMAN  | Probable crossover junction endonuclease EME2[...]       | EME2                           | Homo sapiens (Human) | 379 AA   |

Scribe Manual 9

Select “Download.” If you download the compressed version, you will get a .gz and have to uncompress the file. If you download the uncompressed version, the file may take longer, but it will be in a FASTA format for immediate use.

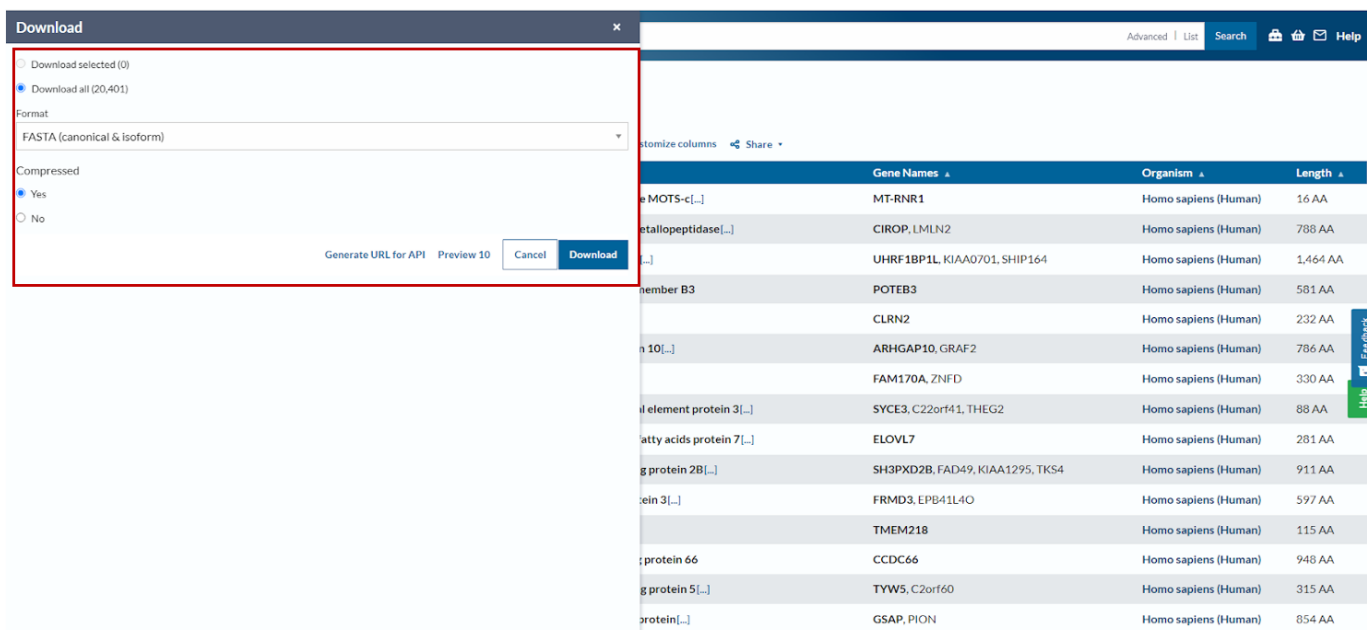

The screenshot shows a 'Download' dialog box on the left and a table of protein data on the right. The dialog box has a red border and contains the following options:

- Download selected (0)
- ☒ Download all (20,401)
- Format: FASTA (canonical & isoform)
- Compressed: ☒ Yes, ☐ No
- Buttons: Generate URL for API, Preview 10, Cancel, Download

The table on the right has columns: Gene Names, Organism, and Length. It lists various proteins from Homo sapiens (Human) with their lengths in amino acids (AA).

| Gene Names                | Organism             | Length   |
|---------------------------|----------------------|----------|
| MOTS-c[...]               | Homo sapiens (Human) | 16 AA    |
| Metalloproteinase[...]    | Homo sapiens (Human) | 788 AA   |
| [...]                     | Homo sapiens (Human) | 1,464 AA |
| member B3                 | Homo sapiens (Human) | 581 AA   |
| [...]                     | Homo sapiens (Human) | 232 AA   |
| n 10[...]                 | Homo sapiens (Human) | 786 AA   |
| [...]                     | Homo sapiens (Human) | 330 AA   |
| element protein 3[...]    | Homo sapiens (Human) | 88 AA    |
| atty acids protein 7[...] | Homo sapiens (Human) | 281 AA   |
| g protein 2B[...]         | Homo sapiens (Human) | 911 AA   |
| tein 3[...]               | Homo sapiens (Human) | 597 AA   |
| [...]                     | Homo sapiens (Human) | 115 AA   |
| protein 66                | Homo sapiens (Human) | 948 AA   |
| g protein 5[...]          | Homo sapiens (Human) | 315 AA   |
| protein[...]              | Homo sapiens (Human) | 854 AA   |

B. Open Scribe to create a Prosit CSV from a FASTA file. Navigate to the “Convert.” Select “Create Prosit CSV from FASTA.” This will open a dialog window.

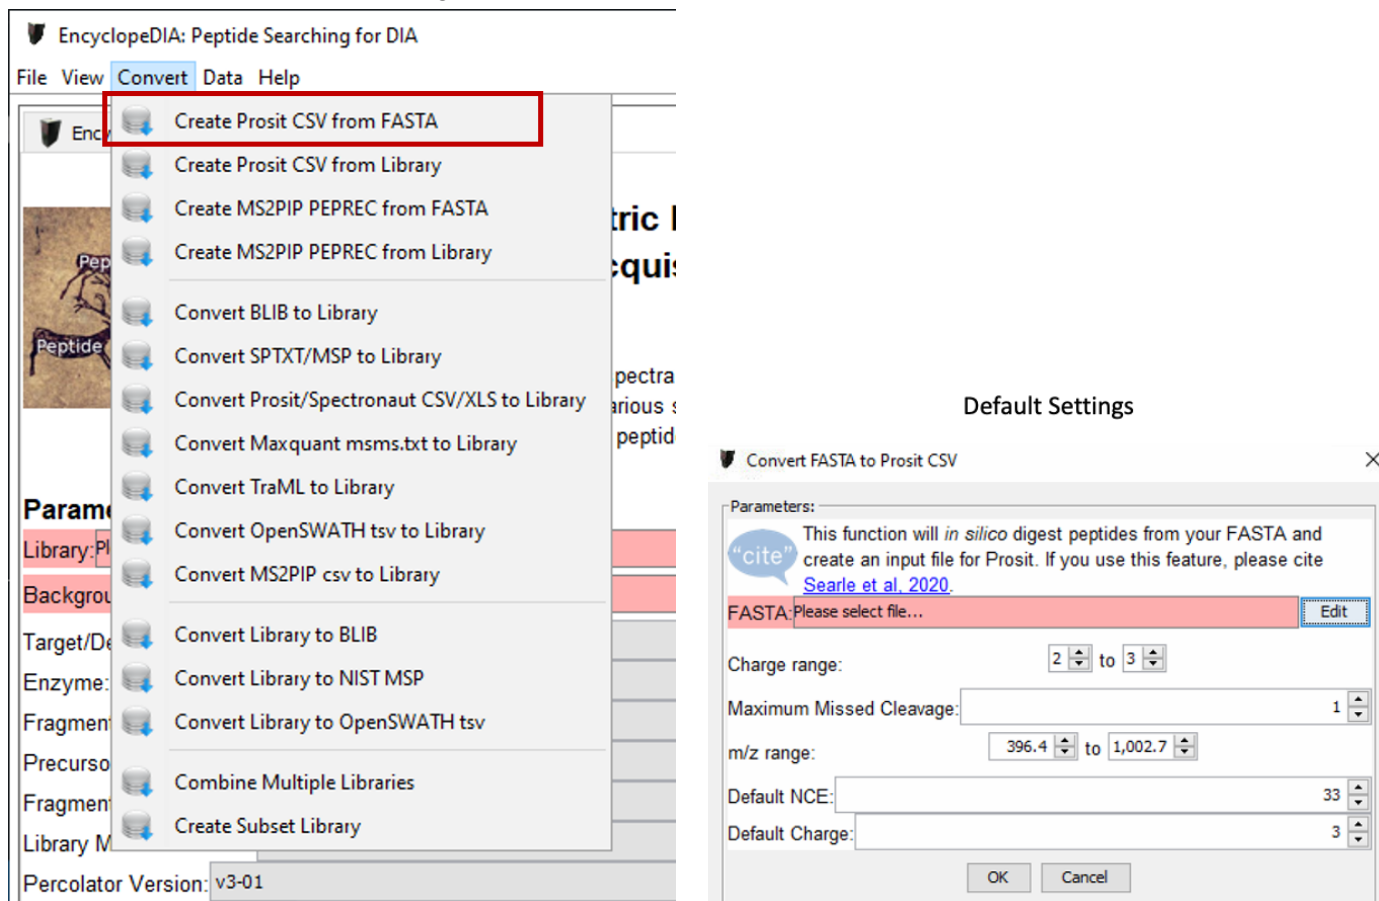

The screenshot shows the 'EncyclopeDIA: Peptide Searching for DIA' interface. The 'Convert' menu is open, and 'Create Prosit CSV from FASTA' is highlighted with a red box. The 'Default Settings' dialog box is also open, showing parameters for converting FASTA to Prosit CSV.

**Convert Menu Options:**

- Create Prosit CSV from FASTA
- Create Prosit CSV from Library
- Create MS2PIP PEPREC from FASTA
- Create MS2PIP PEPREC from Library
- Convert BLIB to Library
- Convert SPTXT/MSP to Library
- Convert Prosit/Spectronaut CSV/XLS to Library
- Convert Maxquant msms.txt to Library
- Convert TraML to Library
- Convert OpenSWATH tsv to Library
- Convert MS2PIP csv to Library
- Convert Library to BLIB
- Convert Library to NIST MSP
- Convert Library to OpenSWATH tsv
- Combine Multiple Libraries
- Create Subset Library

**Default Settings Dialog:**

- Parameters: This function will *in silico* digest peptides from your FASTA and create an input file for Prosit. If you use this feature, please cite [Searle et al. 2020](#).
- FASTA: Please select file... (Edit button)
- Charge range: 2 to 3
- Maximum Missed Cleavage: 1
- m/z range: 396.4 to 1,002.7
- Default NCE: 33
- Default Charge: 3
- Buttons: OK, Cancel

Upload the FASTA you have downloaded. The Prosit CSV will be generated in the same folder where the FASTA is held. If you use the example from the FASTA file provided in the Scribe manuscript, you should load “uniprot\_human-reference\_Reviewed\_2022mar02.fasta.”

Settings for  
“uniprot\_human-reference\_reviewed\_2022mar02.prosit\_input.trypsin\_nce29\_hcd2020.dlib”

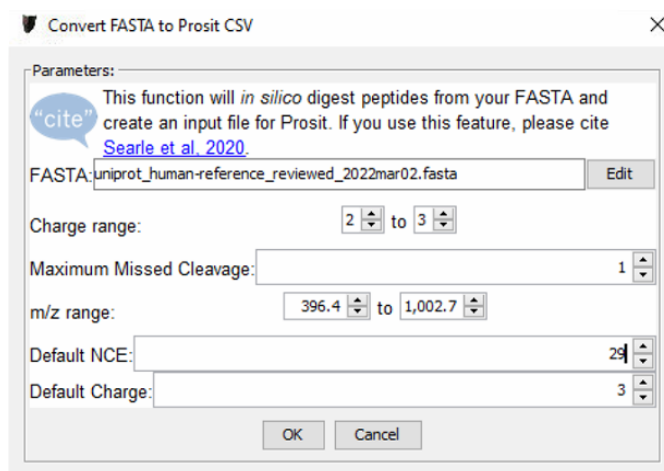

Convert FASTA to Prosit CSV

Parameters:

This function will *in silico* digest peptides from your FASTA and create an input file for Prosit. If you use this feature, please cite [Searle et al. 2020](#).

FASTA: uniprot\_human-reference\_reviewed\_2022mar02.fasta Edit

Charge range: 2 to 3

Maximum Missed Cleavage: 1

m/z range: 396.4 to 1,002.7

Default NCE: 29

Default Charge: 3

OK Cancel

C. Use Prosit to perform an *in silico* digestion, and obtain an .MSP/NIST format text file. Navigate to the Prosit website, [Prosit](#). When you get to the page, there are three tabs available; “CE CALIBRATION,” “SPECTRAL LIBRARY,” and “RESCORING.”

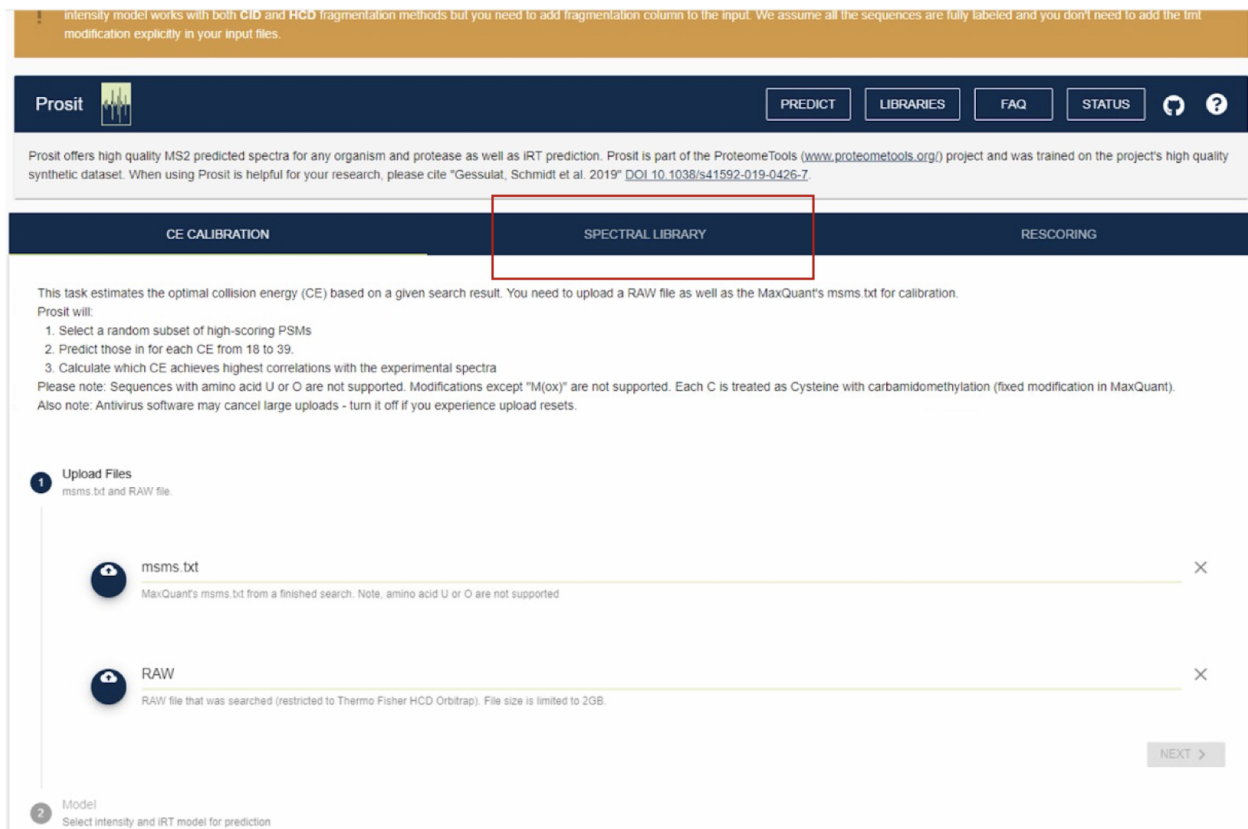

intensity model works with both CID and HCD fragmentation methods but you need to add fragmentation column to the input. We assume all the sequences are fully labeled and you don't need to add the limit modification explicitly in your input files.

Prosit

PREDICT LIBRARIES FAQ STATUS

Prosit offers high quality MS2 predicted spectra for any organism and protease as well as IRT prediction. Prosit is part of the ProteomeTools ([www.proteometools.org](#)) project and was trained on the project's high quality synthetic dataset. When using Prosit is helpful for your research, please cite "Gessulat, Schmidt et al. 2019" DOI 10.1038/s41592-019-0426-7.

CE CALIBRATION SPECTRAL LIBRARY RESCORING

This task estimates the optimal collision energy (CE) based on a given search result. You need to upload a RAW file as well as the MaxQuant's msms.txt for calibration.

Prosit will:

1. Select a random subset of high-scoring PSMs
2. Predict those in for each CE from 18 to 39.
3. Calculate which CE achieves highest correlations with the experimental spectra

Please note: Sequences with amino acid U or O are not supported. Modifications except "M(ox)" are not supported. Each C is treated as Cysteine with carbamidomethylation (fixed modification in MaxQuant).

Also note: Antivirus software may cancel large uploads - turn it off if you experience upload resets.

1 Upload Files  
msms.txt and RAW file.

msms.txt  
MaxQuant's msms.txt from a finished search. Note, amino acid U or O are not supported

RAW  
RAW file that was searched (restricted to Thermo Fisher HCD Orbitrap). File size is limited to 2GB.

NEXT >

2 Model  
Select intensity and IRT model for prediction



Go to the “SPECTRAL LIBRARY” tab.

We now offer two new Prosit TMT models that will soon be published. One is for fragment intensities prediction (Prosit\_TMT\_intensity\_2021) and the other is for IRT prediction (Prosit\_TMT\_irt\_2021). The intensity model works with both CID and HCD fragmentation methods but you need to add fragmentation column to the input. We assume all the sequences are fully labeled and you don't need to add the tmt modification explicitly in your input files.

Prosit 

PREDICT LIBRARIES FAQ STATUS ?

Prosit offers high quality MS2 predicted spectra for any organism and protease as well as IRT prediction. Prosit is part of the ProteomeTools ([www.proteometools.org/](http://www.proteometools.org/)) project and was trained on the project's high quality synthetic dataset. When using Prosit is helpful for your research, please cite "Gessulat, Schmidt et al. 2019" DOI:10.1038/s41592-019-0426-7.

CE CALIBRATION SPECTRAL LIBRARY RESCORING

This task generates a spectral library either by digesting a given FASTA file, or by predicting a list of peptides given in a CSV file. You need to provide a collision energy (CE) for prediction. To estimate an optimal CE for prediction, please use "CE Calibration".

When a FASTA file is provided, Prosit will:

1. Digest the FASTA, for the given parameters (i.e. protease).
2. Predict all spectra at the given collision energy.

When a CSV with peptides is provided, Prosit will directly predict all spectra.

Please note: Antivirus software may cancel large uploads - turn it off if you experience upload resets.

**1 Settings**

Indicate collision energy, the maximum number of missed cleavages, and number of oxidized methionines per peptide.

How would you like to provide the list of peptides?

☒ CSV

☐ FASTA (coming soon)

CSV Format

| modified_sequence    | collision_energy | precursor_charge | T    | fragmentation |
|----------------------|------------------|------------------|------|---------------|
| M(ox)CSDSDGLAPPQHLIR | 15               | 2                | Only | HCD           |

For the 1st step, CSV is already selected. You can click next to get to the 2nd step. Upload the Prosit CSV created in Scribe.

Indicate collision energy, the maximum number of missed cleavages, and number of oxidized methionines per peptide.

**2 Upload Files**

Fasta or CSV with list of peptides

CSV Format

| modified_sequence       | collision_energy | precursor_charge | T                   | fragmentation |
|-------------------------|------------------|------------------|---------------------|---------------|
| M(ox)CSDSDGLAPPQHLIR    | 15               | 2                | For TMT models Only | HCD           |
| EMPQSDPSVEPPLSQETFSDLWK | 28               | 2                |                     | HCD           |
| TCPVQLWVDSTPPGTR        | 35               | 3                |                     | CID           |
| QSQHM(ox)TEVVR          | 35               | 5                |                     | CID           |

Please provide all three columns below and use , as a separator.

- **modified\_sequence** Use upper case letters in the column and indicate oxidized Methionine with "M(ox)". Sequence length is restricted to the range of 7 to 30. Each C is treated as Cysteine with carbamidomethylation. Prosit does not support U or O as amino acids.
- **collision\_energy** Use integer values from 10 and 50.
- **precursor\_charge** Use integer values from 1 to 6.
- **fragmentation** Either HCD or CID. Use upper case letters.\*

\*Only for TMT model

 peptides.csv  
containing peptide sequence, collision energy and precursor charge.

 

**3 Model**

Select intensity and IRT model for prediction

**4 Isobaric Label**

If TMT model is selected



Once the CSV has once loaded, click next.

1 Indicate collision energy, the maximum number of missed cleavages, and number of oxidized methionines per peptide.

2 Upload Files  
Fasta or CSV with list of peptides

CSV Format

| modified_sequence       | collision_energy | precursor_charge |                        | fragmentation |
|-------------------------|------------------|------------------|------------------------|---------------|
| M(ox)CSDSDGLAPPQHLIR    | 15               | 2                | For TMT<br>models Only | HCD           |
| EMPQSDPSVEPPLSQETFSDLWK | 28               | 2                |                        | HCD           |
| TCPVQLWVDSTPPPGTR       | 35               | 3                |                        | CID           |
| QSQHM(ox)TEVVR          | 35               | 5                |                        | CID           |

Please provide all three columns below and use , as a separator.

- modified\_sequence** Use upper case letters in the column and indicate oxidized Methionine with "M(ox)". Sequence length is restricted to the range of 7 to 30. Each C is treated as Cysteine with carbamidomethylation. Prosit does not support U or O as amino acids.
- collision\_energy** Use integer values from 10 and 50.
- precursor\_charge** Use integer values from 1 to 6.
- fragmentation** Either HCD or CID. Use upper case letters.

\*Only for TMT model

uniprot\_human-reference\_reviewed\_2022mar02.fasta.trypsin.z3\_nce29.csv

containing peptide sequence, collision energy and precursor charge.

< BACK NEXT >

3 Model  
Select intensity and iRT model for prediction

4 Isobaric Label  
If TMT model is selected

Select the desired model. For this example, we want to use the “Prosit\_2020\_intensity\_hcd” for the Intensity prediction model, and the “Prosit\_2019\_irt” for the iRT prediction model. Click next.

Please note: Antivirus software may cancel large uploads - turn it off if you experience upload resets.

1 Settings  
Indicate collision energy, the maximum number of missed cleavages, and number of oxidized methionines per peptide.

2 Upload Files  
Fasta or CSV with list of peptides

3 Model  
Select intensity and iRT model for prediction

Intensity prediction model

☐ Prosit\_2019\_intensity\_hcd

☐ Prosit\_2020\_intensity\_preview

☒ Prosit\_2020\_intensity\_hcd

☐ Prosit\_2020\_intensity\_cid

☐ Prosit\_TMT\_intensity\_2021

iRT prediction model

☒ Prosit\_2019\_irt

☐ Prosit\_TMT\_irt\_2021

< BACK NEXT >

4 Isobaric Label  
If TMT model is selected

5 Task ID  
Check if everything is correct and submit the task

For Task ID Output format, select “NIST .MSP Text Format of individual spectra (Skyline and MSPepSearch compatible).”

The screenshot shows the 'Task ID' step of the Prosit submission process. The interface has a dark blue header with three tabs: 'CE CALIBRATION', 'SPECTRAL LIBRARY', and 'RESCORING'. Below the header, there is a text block explaining the task: 'This task generates a spectral library either by digesting a given FASTA file, or by predicting a list of peptides given in a CSV file. You need to provide a collision energy (CE) for prediction. To estimate an optimal CE for prediction, please use "CE Calibration".' It then lists two scenarios: 'When a FASTA file is provided, Prosit will: 1. Digest the FASTA, for the given parameters (i.e. protease). 2. Predict all spectra at the given collision energy.' and 'When a CSV with peptides is provided, Prosit will directly predict all spectra.' A note states: 'Please note: Antivirus software may cancel large uploads - turn it off if you experience upload resets.'

Below this text are five steps, each with a checkmark icon and a title: 'Settings' (Indicate collision energy, the maximum number of missed cleavages, and number of oxidized methionines per peptide), 'Upload Files' (Fasta or CSV with list of peptides), 'Model' (Select intensity and IRT model for prediction), 'Isobaric Label' (If TMT model is selected), and 'Task ID' (Check if everything is correct and submit the task). The 'Task ID' step is currently active and highlighted with a red border.

Inside the 'Task ID' step, there is a section titled 'Output format' with two radio button options: 'NIST .MSP Text Format of individual spectra (Skyline and MSPepSearch compatible)' (which is selected) and 'Generic text (Spectronaut compatible). All fragments are reported.' At the bottom right of the 'Task ID' section are two buttons: 'BACK' and 'SUBMIT'.

Submit the task. It is helpful to record the task number or bookmark the page shown after you submit the task to come back to once the job is complete.

The screenshot shows the task status page on the Prosit website. At the top, there is a yellow banner with an exclamation mark icon and text: 'We now offer two new Prosit TMT models that will soon be published. One is for fragment intensities prediction (Prosit\_TMT\_intensity\_2021) and the other is for IRT prediction (Prosit\_TMT\_irt\_2021). The intensity model works with both CID and HCD fragmentation methods but you need to add fragmentation column to the input. We assume all the sequences are fully labeled and you don't need to add the tmt modification explicitly in your input files.'

Below the banner is the Prosit logo and a navigation bar with buttons: 'PREDICT', 'LIBRARIES', 'FAQ', 'STATUS', and a help icon. Below the navigation bar is a text block: 'Prosit offers high quality MS2 predicted spectra for any organism and protease as well as IRT prediction. Prosit is part of the ProteomeTools ([www.proteomertools.org/](http://www.proteomertools.org/)) project and was trained on the project's high quality synthetic dataset. When using Prosit is helpful for your research, please cite "Gessulat, Schmidt et al. 2019" DOI 10.1038/s41592-019-0426-7.'

Below this is a dark blue header with the text 'Task 63E59E6B03CB54EC9E46D2AA185FCB8F'. Below this header is a text block: 'This task is in progress. Tasks may take several hours for full proteomes depending on system load. Please note down your Task ID or save this URL to check back later. You can download the results here upon completion. Resubmitting tasks will not lead to faster results.'

Once the task is done, download the .MSP file.

The screenshot shows the task completion page on the Prosit website. It has the same layout as the previous screenshot, including the yellow banner, Prosit logo, navigation bar, and introductory text. The task ID 'Task 63E59E6B03CB54EC9E46D2AA185FCB8F' is still displayed.

Below the task ID header, the text 'Your files are ready.' is displayed. Below this text is a red-bordered box containing a blue button with the text 'DOWNLOAD'.

D. Convert the Prosit output (.MSP/NIST) to a Library (.DLIB) using Scribe. In Scribe, go to “Convert,” then navigate to “Convert SPTXT/MSP to Library.” This window will pop up.

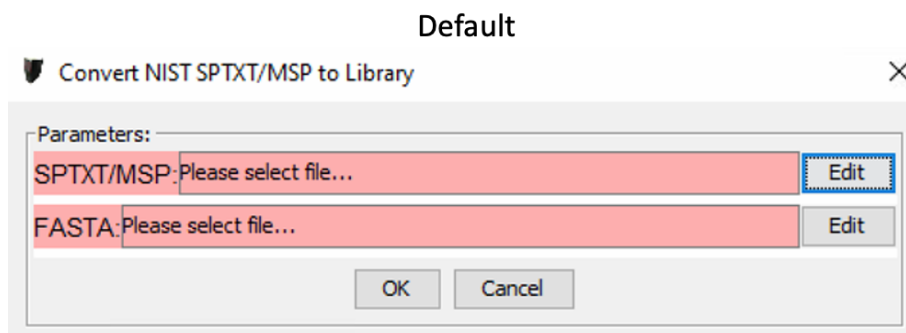

Upload the downloaded .MSP file from Prosit, and the FASTA file used to generate the .MSP.

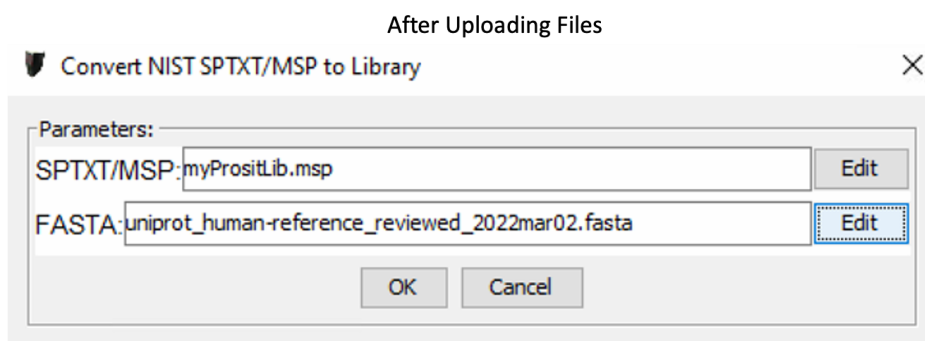

Click okay. The dialog box will indicate the .MSP file is being converted to a .DLIB. Once it is complete, the dialog box will tell you.

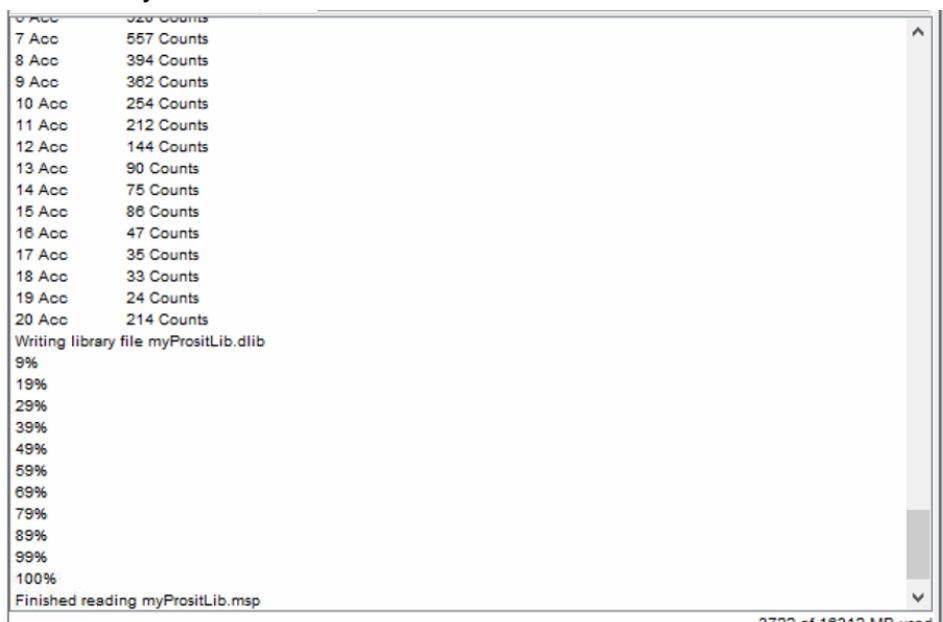

The resulting .DLIB should be analogous to [uniprot\\_human-reference\\_reviewed\\_2022mar02.prosit\\_input.trypsin\\_nce29\\_hcd2020.dlib](#).

## 4. SCRIBE SEARCH OPTIONS

Descriptions of the search options available in Scribe.

Here is a screenshot of the Scribe default search options:

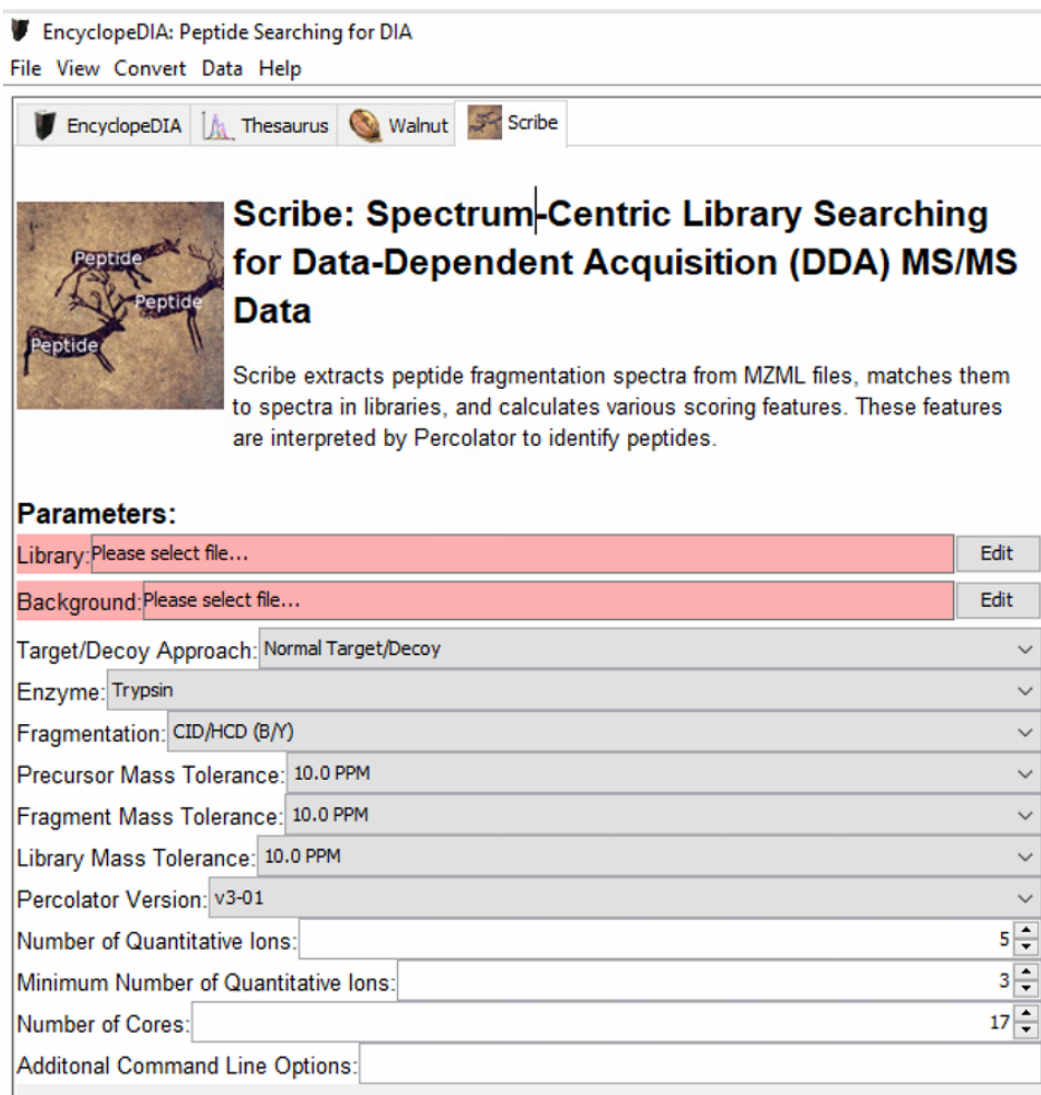

The screenshot shows the Scribe application window titled "EncyclopeDIA: Peptide Searching for DIA". The menu bar includes "File", "View", "Convert", "Data", and "Help". The toolbar contains icons for "EncyclopeDIA", "Thesaurus", "Walnut", and "Scribe". The main content area features a logo with three deer labeled "Peptide" and the title "Scribe: Spectrum-Centric Library Searching for Data-Dependent Acquisition (DDA) MS/MS Data". Below the title, a description states: "Scribe extracts peptide fragmentation spectra from MZML files, matches them to spectra in libraries, and calculates various scoring features. These features are interpreted by Percolator to identify peptides." The "Parameters:" section includes the following settings:

| Parameter                            | Value                 | Action |
|--------------------------------------|-----------------------|--------|
| Library:                             | Please select file... | Edit   |
| Background:                          | Please select file... | Edit   |
| Target/Decoy Approach:               | Normal Target/Decoy   | ▼      |
| Enzyme:                              | Trypsin               | ▼      |
| Fragmentation:                       | CID/HCD (B/Y)         | ▼      |
| Precursor Mass Tolerance:            | 10.0 PPM              | ▼      |
| Fragment Mass Tolerance:             | 10.0 PPM              | ▼      |
| Library Mass Tolerance:              | 10.0 PPM              | ▼      |
| Percolator Version:                  | v3-01                 | ▼      |
| Number of Quantitative Ions:         | 5                     | ▲▼     |
| Minimum Number of Quantitative Ions: | 3                     | ▲▼     |
| Number of Cores:                     | 17                    | ▲▼     |
| Additional Command Line Options:     |                       |        |

A. Scribe has several options for searching files. Before you can start loading data, you need to specify both a .DLIB or .ELIB library to search as well as a background FASTA. These will be shaded red until they are properly specified. Libraries can be either in the .ELIB (chromatogram library) or .DLIB (spectrum library) format.

B. Scribe has several other search settings. As a general rule, we recommend using the default search parameters first. Other settings are defined below:

**Target/Decoy Approach:** In some circumstances, it may be necessary to add additional decoys to improve statistical analysis. However, as a general rule, this should be left at "Normal Target/Decoy".

**Enzyme:** Several common digestion enzymes are supported.

Fragmentation: In general, we recommend using CID/HCD (B/Y) fragmentation for most CID or HCD experiments. However, if your library is particularly large or messy you may get improved results with “HCD (y- only)”.

**Precursor/Fragment/Library Mass Tolerance:** Tolerances can be specified in PPM, AMU, or resolution.

**Percolator Version:** Percolator 3.1 is recommended for most experiments.

**Number of Cores:** This is the number of CPU cores you allow EncyclopeDIA to use. The maximum value you should set this to is one less than the number of cores your computer has. You need to leave at least one core for background processes.

C. Additional command line options can be specified in the command line options box. For example:

Additional Command Line Options:

D. Use the “Add MZML” button to add RAW files for library searching. These will be automatically placed on the queue and executed in order using the current settings. If an MZML has been previously analyzed, Scribe will remember where it left off and try to not process it a second time.

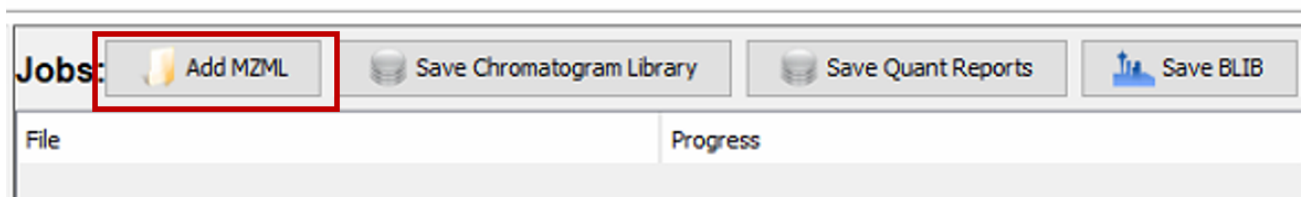

Here is a screenshot of the Scribe search queue:

| File                                              | Progress            |
|---------------------------------------------------|---------------------|
| Read 2022_09_01_HeLa_500ng_16mzst_DDA_NCE_22.mzML | Converting files... |
| Read 2022_09_01_HeLa_500ng_16mzst_DDA_NCE_27.mzML |                     |
| Read 2022_09_01_HeLa_500ng_16mzst_DDA_NCE_32.mzML |                     |
| Read 2022_09_01_HeLa_500ng_16mzst_DDA_NCE_37.mzML |                     |
| Read 2022_09_01_HeLa_500ng_16mzst_DDA_NCE_42.mzML |                     |

E. Search results can also be saved for downstream quantitative assessment using the “Save Quant Reports” button. RAW files between these experiments are expected to contain shared peptides so retention-time alignment is performed and match-between-runs quantification is calculated.

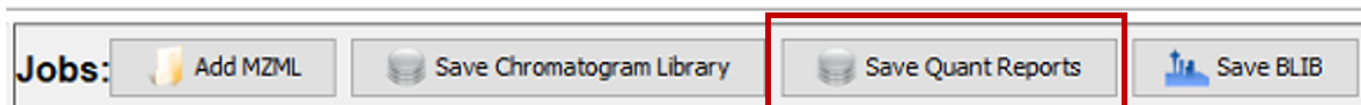

## 5. INTERPRETATION OF SCRIBE OUTPUTS

Descriptions of the output files given from Scribe.

Scribe outputs figures as PDFs displaying fits for retention time (RT), MS1, MS2, delta MS1, and delta MS2. These files can be used to partially assess Scribe's performance in matching spectra to peptides. Additional metrics can be found using the Features viewer, described in part 6 of this manual.

### A. PDFs and corresponding text files

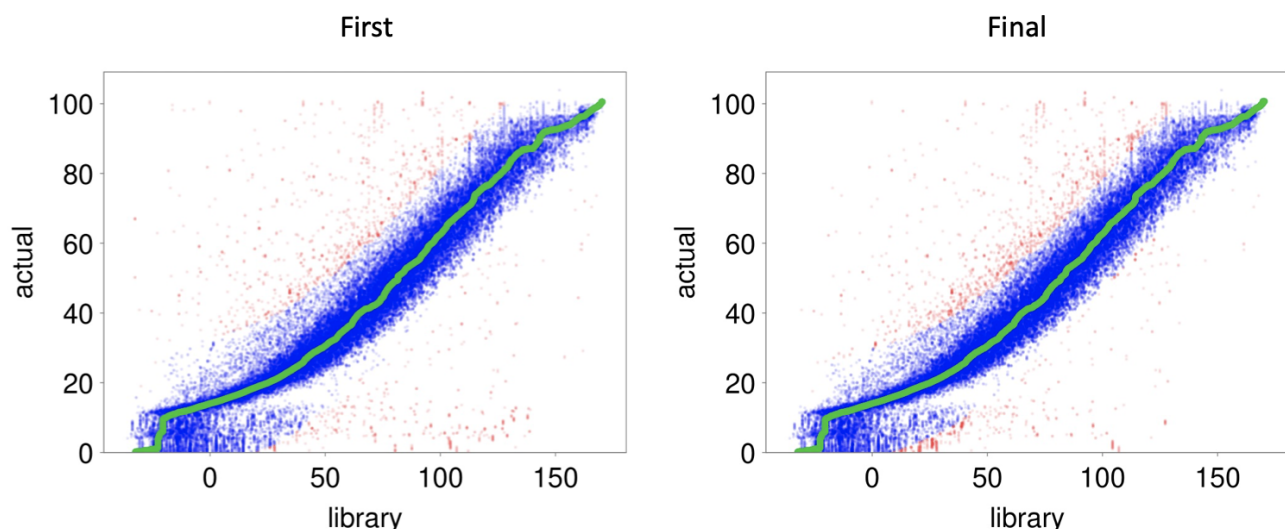

RT plots show the Prosit-predicted RT to the actual RT detected. The green line shows the trace of the kernel density estimation (KDE) RT fit. The blue dots indicate peptides that are matched within 3 standard deviations of the green fit. The red dots represent peptides that are rejected by the alignment, which are outside of 3 standard deviations of the median fit.

In the first fit, peptide FDRs are calculated using Percolator, then fed back into the RT algorithm for further refinement. The refined, or final retention time fit is represented in the second plot. Peptides that are sent through the second pass of the Percolator are a low fraction of the peptides that were fed into the first pass. As a result, the first and final traces only look subtly different. For the remaining plots, only the final fit will be shown.

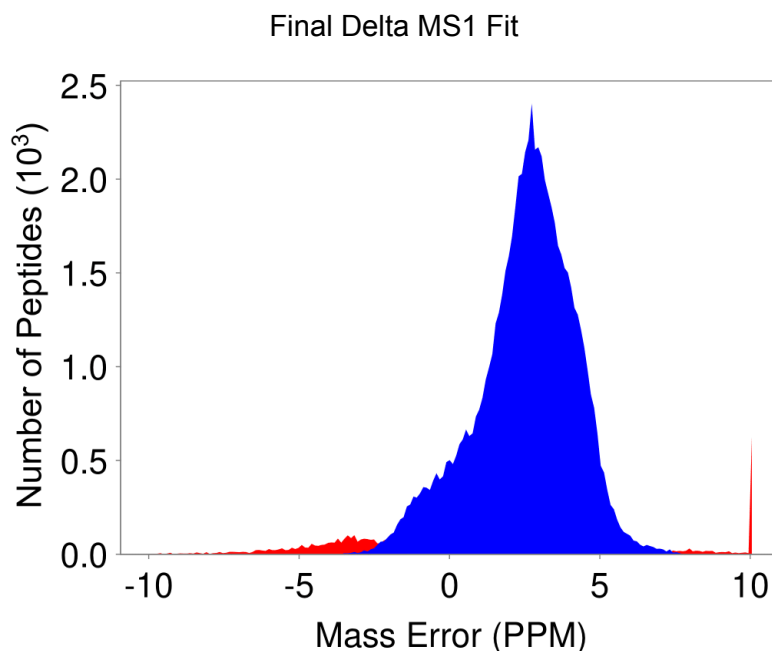

Similarly to the RT fit, the delta MS1 fit displays the mass error of peptide detections. The error is calculated by comparing the expected mass of a given precursor to the detected mass. The blue portion of the peak represents peptides found within 3 standard deviations of this mass error fit, while the red represents peptides outside of this range.

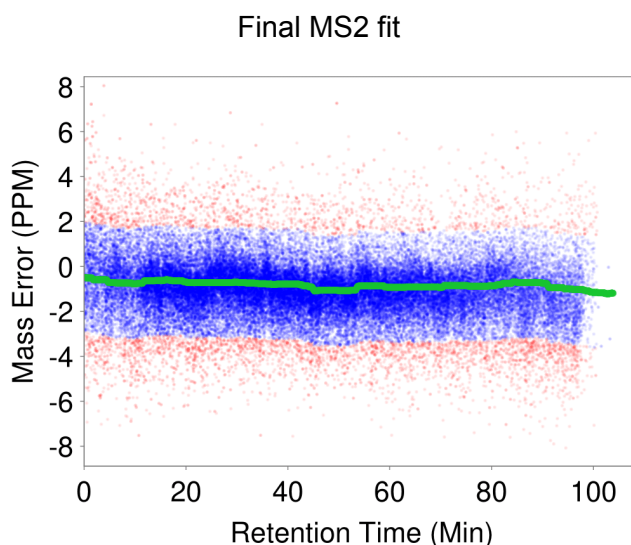

Precursor  $m/z$  and fragment  $m/z$  have outputs that plot RT vs precursor mass error. We expect the acceptable error to be within the mass error that is selected during the peptide search. For this search, a mass tolerance of 10 PPM was selected for fragment ions, which gives the green line, or the median mass error fit. The blue dots represent peptides identified within 3 standard deviations of the median mass error, while the red dots are peptides that fall outside of this range. Although the MS1 and delta MS2 fit are not shown, both plots can be interpreted using the same principles described here.

#### D. Other files generated during sample searches and quantitation



### Scribe.txt, decoy.txt, and features.txt

The ending in “.scribe.txt” contains 6 columns. The first column is the PMSid or sample name concatenated to intensity, peptide sequence, and charge. The next columns contain the scribe score, q-value, and posterior error probability. The Scribe score is a sum of squares error calculated from the actual intensity and the predicted intensity. This value reports the difference between the observed intensity and the predicted intensity. The last two columns contain peptides with protein matches. You can use this text file to assess the peptide spectral match for targets of interest

Files ending in .scribe.decoy.txt contain analogous scoring and information for the decoys generated for FDR estimation.

Features.txt files contain the complete 17 scores the Scribe algorithm uses to match peptide spectra to their target proteins using Prosit-predicted libraries.

### Protein and Peptide.txt

After clicking “Save Quant Reports,” a quantitative output is formatted in easy-to-use .txt files at both the protein and peptide levels. The protein and peptide reports use match-between-runs for quantification and therefore are only generated if you are searching more than one .mzML file. Quant report files are formatted as expression matrices that can be analyzed by hand in a program such as excel, or reformatted for use in a package using software like R or Python. Samples are in columns, while peptides or proteins are in rows. The number of peptides and the number of fragments are included as an additional column.

### Diffacto inputs

Scribe also produces easy-to-outputs to use in Python with the differential expression tool Diffacto. This software, developed by Lukas Käll's research group, is capable of processing and normalizing data before performing a differential expression analysis using bayesian modeling to select only peptides that behave similarly to each other. Scribe writes the necessary .csv file for sample abundances, and the .lst file containing annotations. The .lst output contains sample annotations. The default lists all samples as separate sample groups. You will need to manually enter sample groupings before using Diffacto, if you wish for samples to be grouped by condition. To use Diffacto, consult its [Github](#) page.

Diffacto citation: Zhang, Bo et al. Covariation of Peptide Abundances Accurately Reflects Protein Concentration Differences Molecular & Cellular Proteomics, Volume 16, Issue 5, 936 - 948.  
<https://doi.org/10.1074/mcp.O117.067728>.

### F. Library, .dia, and model files

When Scribe performs quantitation on individual files, or match-between-run quantitation of multiple files, an ELIB file is generated as a part of the output. ELIB files contain the same information present in DLIBs, with retention time information added. The ELIB output can be uploaded to Skyline or EncyclopeDIA to visualize peptides, or opened in a SQLite DB Browser to extract specific information using a query. Refer to part 6 for more information on how to visualize ELIBs and DLIBs.

Scribe writes .dia files as it is processing samples against predicted libraries. These files are read by EncyclopeDIA when visualizing .mzML files, and can also be read in Skyline.

MODEL files are necessary for visualizing data in EncyclopeDIA, and should not be deleted or moved.



## 6. VISUALIZING DATA WITH BUILT-IN FEATURES

Three ways to access data processed by Scribe,

Using the outputs you obtain from Scribe or EncyclopeDIA, you can visualize the data using three methods; through an SQLite database browser, using Scribe, or looking through the data manually within excel. This is not an all-inclusive list of ways to analyze or visualize the data.

### A. Accessing the data through SQLite

ELIB and DLIB files are formatted as SQLite databases, allowing users to access the data through an SQLite viewer, such as [DB Browser for SQLite](#). Below is a map of how DLIB databases are structured. SQL databases contain tables, which are represented as boxes in the map, the names of these tables are “entries,” “metadata,” “peptidequants,” “peptidescores,” “peptidetoprotein,” and “proteinscores.” Each box contains the column names within the tables and the type of data each column contains. For example, “PeptideCharge” is formatted as “int,” indicating the peptide charges are integers in the data table.

### Scribe .DLIB Database (DDA Library)

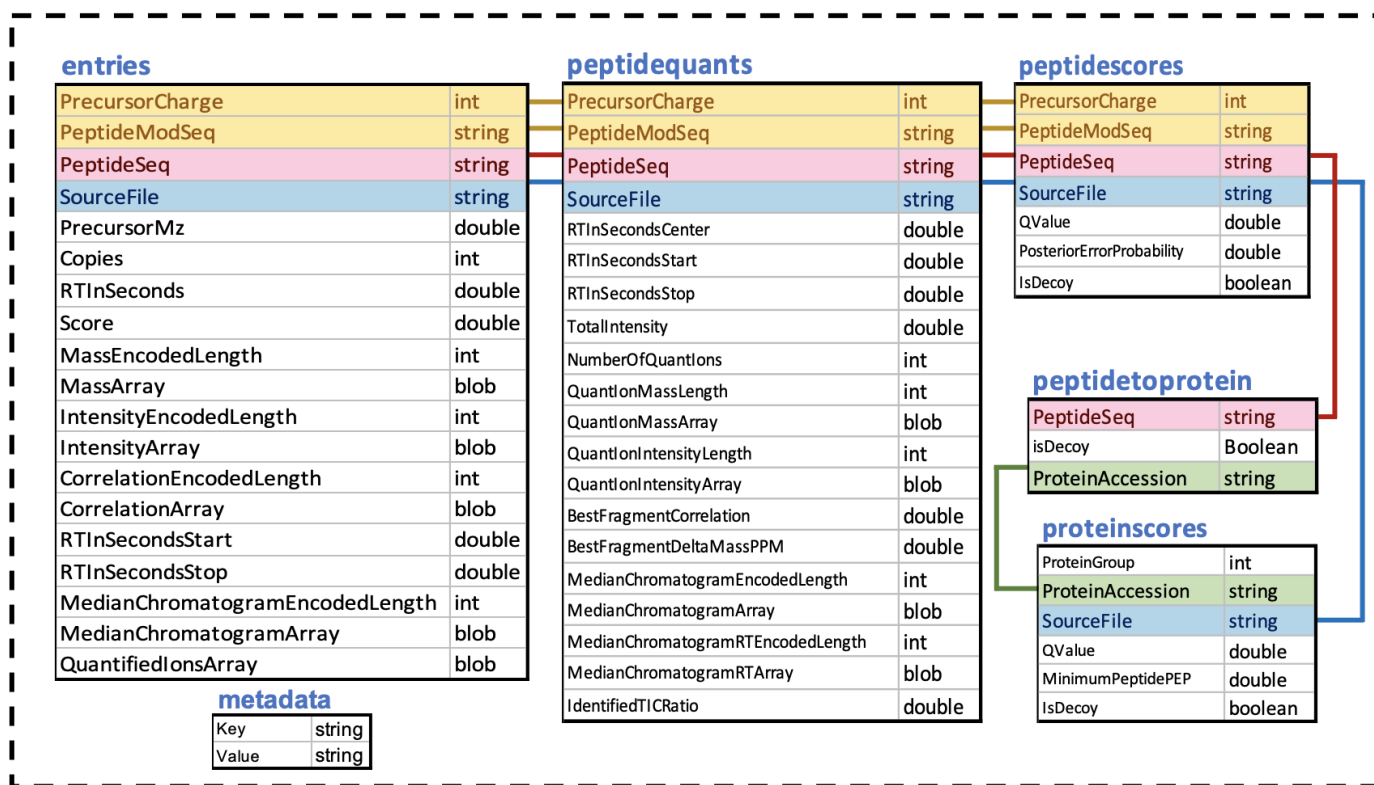

To open the browser, double-click the icon on the desktop, or find the program in the location it was downloaded.

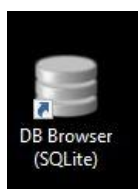

Once the database browser is open, go to the File > Open Database menu option, then find the ELIB in the location where it is stored.

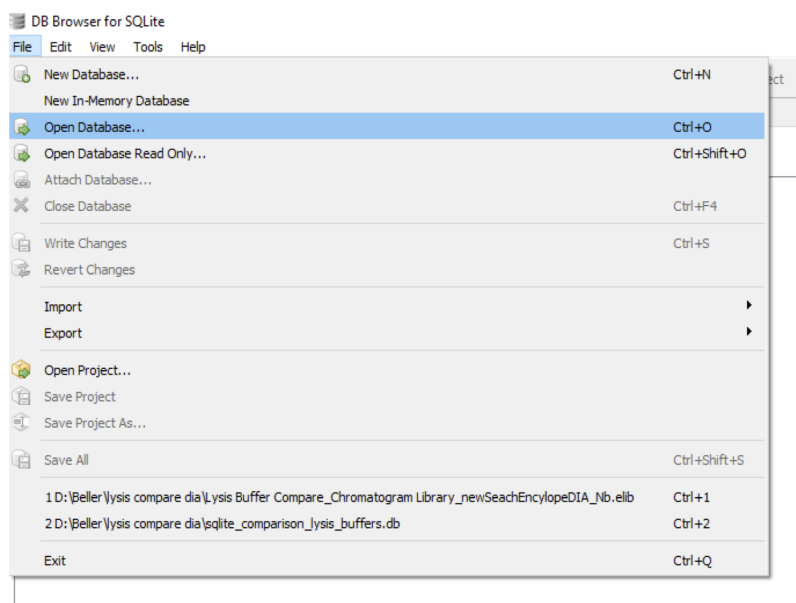

On the first tab, you can visualize the database structure. For example, the first file in the database is the “entries” table, as you can see below. This matches the information seen in the map above. You can see there are 9 tables in total. Below the tables, are indices, which are lookups for finding information within tables.

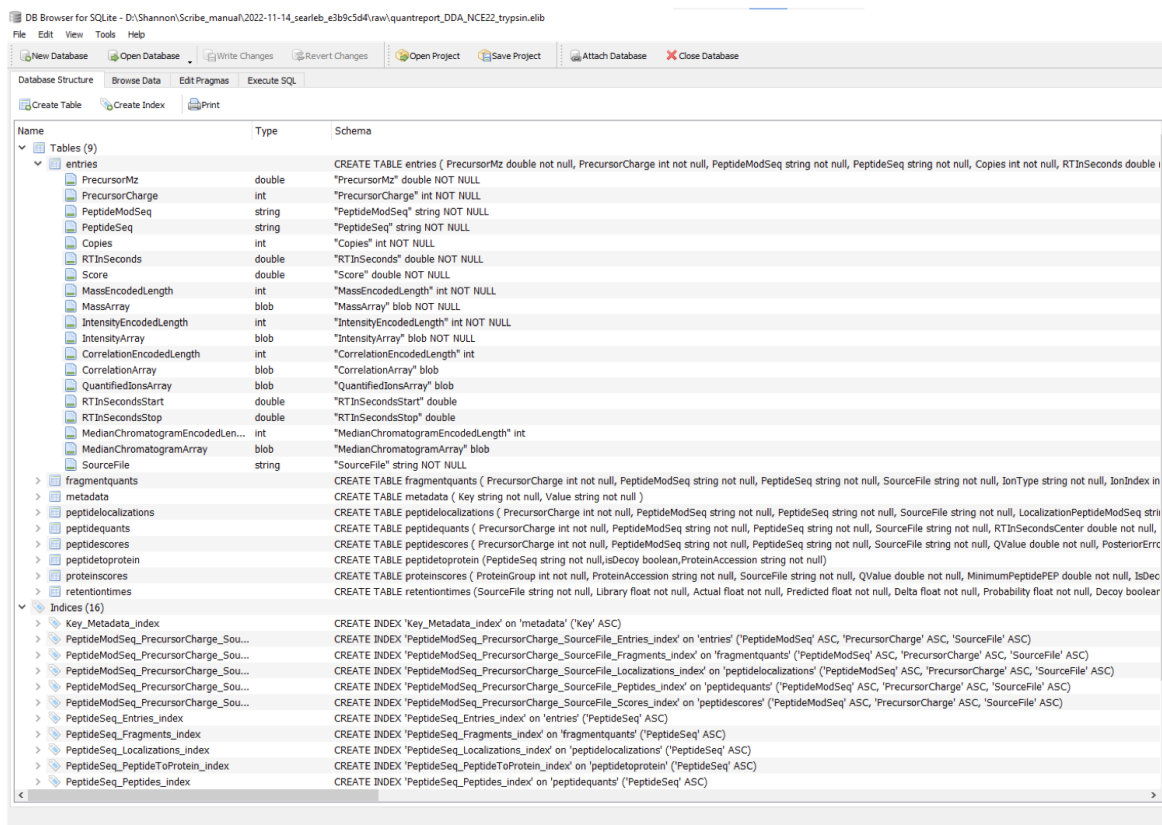

If you click on the next tab, “Browse Data,” you will be able to look through tables.

The screenshot shows the 'Browse Data' tab in a database browser. The 'Database Structure' pane on the left shows a tree view with 'peptidequants' selected. The main pane displays a table with the following columns: PeptideModSeq, PeptideSeq, SourceFile, RTInSecondsCenter, RTInSecondsStart, RTInSecondsStop, and TotalInten. The table contains 30 rows of data, with the first row showing a peptide sequence 'EETLDTK' from source file '2022\_09\_01\_HeLa\_500mg\_16mzst\_DDA\_NCE\_27...'. The table is filtered by 'Filter' and 'Filter' columns.

You can use filters to obtain specific data you are interested in, or use regular expressions for a more powerful query. To export a table you are interested in specifically, click “File > Export > Table(s) as CSV.”

The screenshot shows the 'Export' menu in the database browser. The 'Export' menu is open, showing options to export data as CSV or JSON. The 'Table(s) as CSV file...' option is selected. The table structure is visible in the background, showing columns for PeptideModSeq, PeptideSeq, SourceFile, RTInSecondsCenter, RTInSecondsStart, RTInSecondsStop, and TotalIntensity.

For more information on using DB Browser for SQLite check out the [SQLite Browser Wiki Github Page](#).

## B. Looking at data through Scribe's built-in visualization tools.

EncyclopeDIA and Scribe have built-in tools to help you visualize raw data, in .mzML format, libraries, and quant reports. Use the View menu to access the following options for visualizing data.

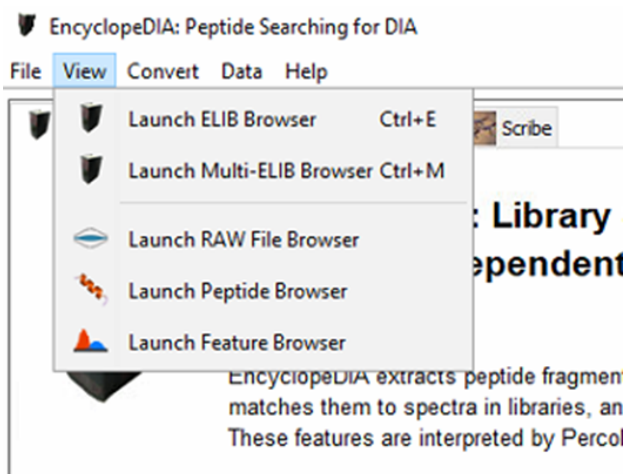

## ELIB Browser

Click on "Launch ELIB Browser" to visualize a library relative to an individual sample. Click "edit" to select the library file you would like. Then do the same for the RAW file, in .mzML format. Note: EncyclopeDIA cannot read files in RAW form.

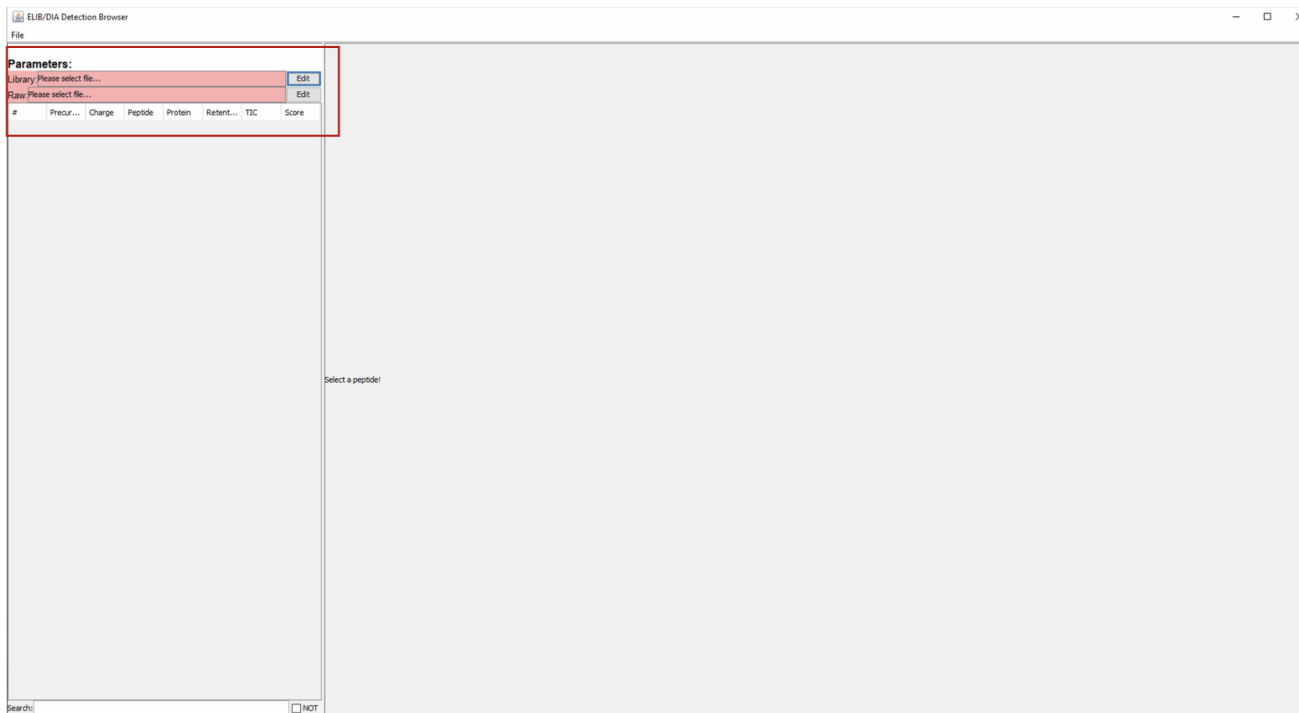



Once the files are loaded, peptides will populate. The screen will pull up this view.

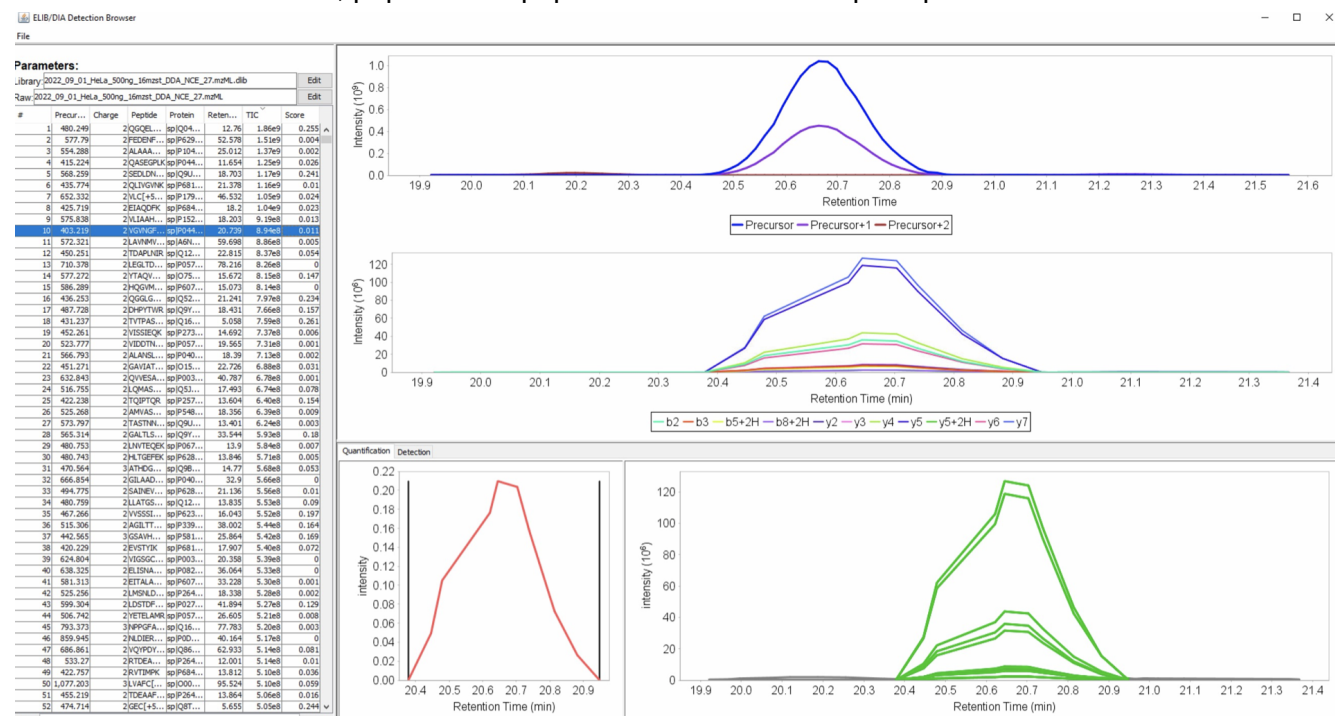

At the bottom, use the search bar to search for specific proteins or peptides. You can see in this example, the precursor spectra for the peptide “VVSSIVDK” is symmetrical. For the MS2 spectra, the b2, b4+2H, y3, y6 y7 and y8 peptides were detected without interference. Visualization is presented as chromatograms, showing the relationship between ions in multiple spectral acquisitions of the same peptide.

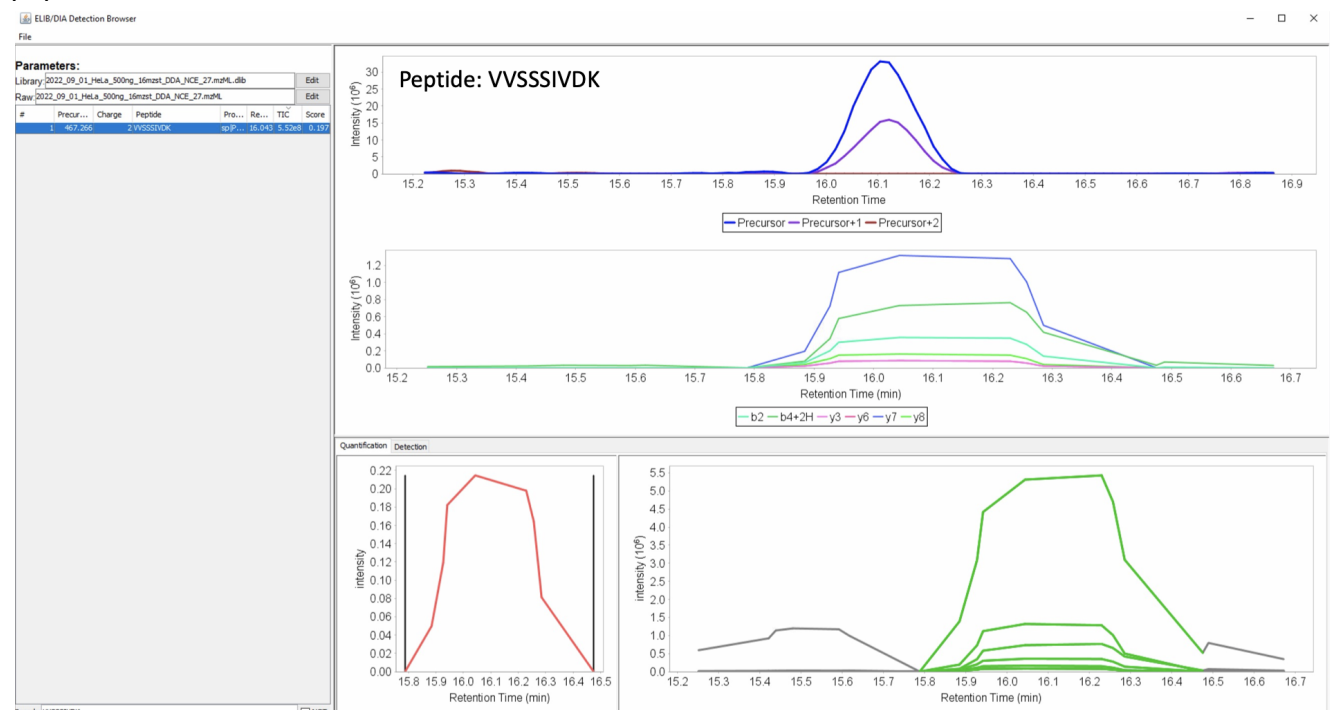

## Multi-ELIB Browser

Click on “Launch Multi-ELIB Browser” to visualize data across all raw files in a quantitative result. Using this view, you can visualize peptides present in multiple samples.

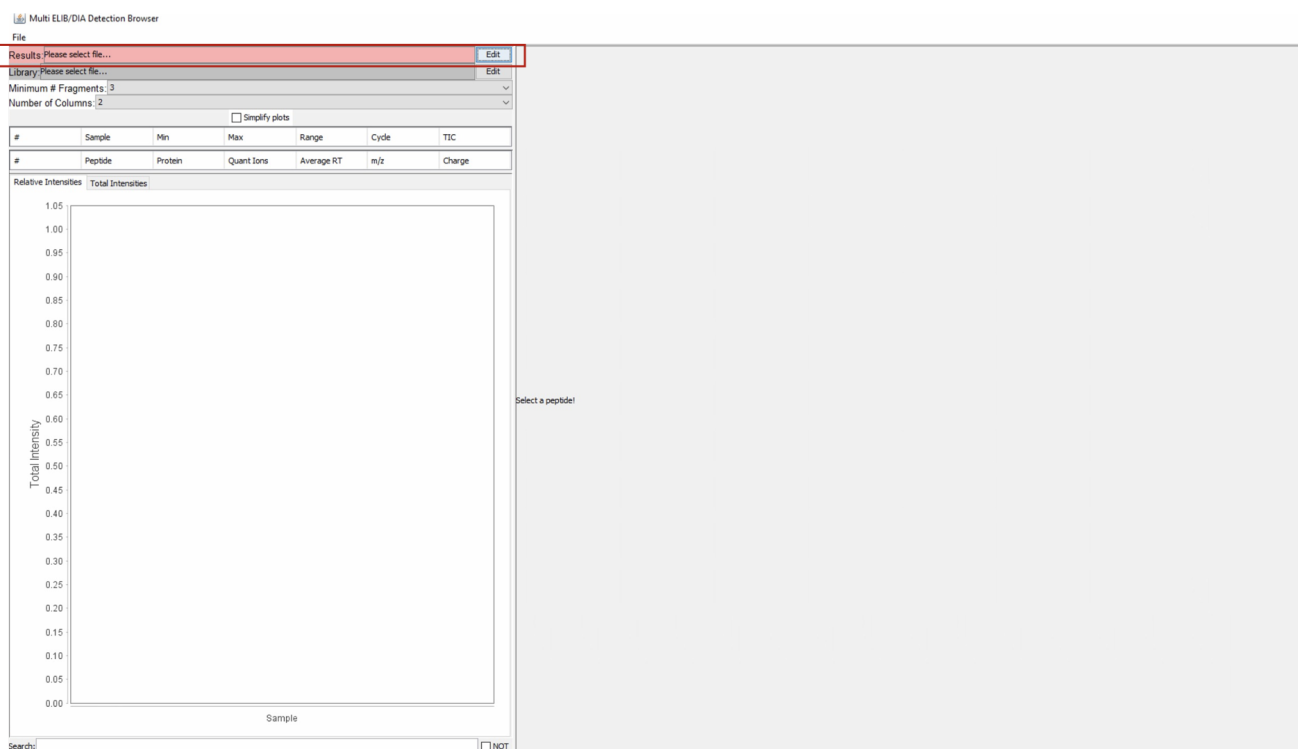

Click “edit” to upload the results file you are interested in viewing. You can insert the library file as well, although it is not necessary to visualize samples. Once uploaded, the view should look like this:

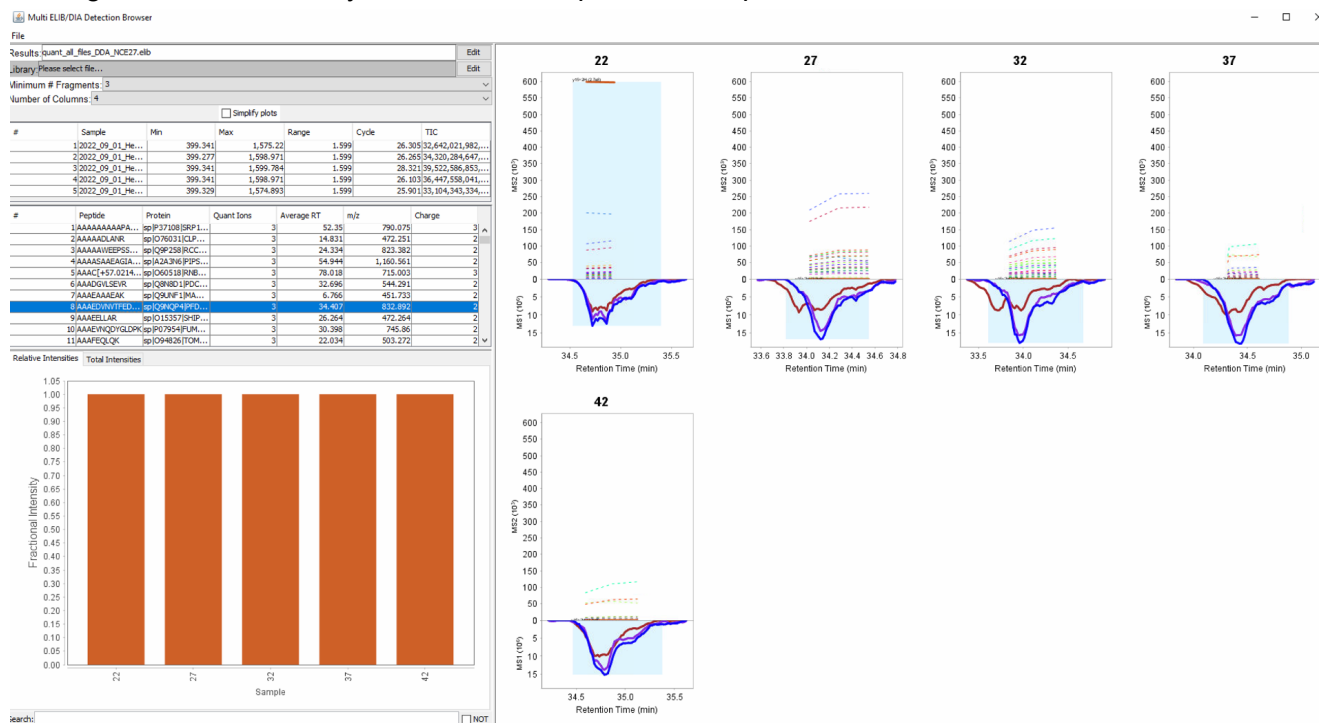

The minimum number of fragments per peptide can be set to limit the peptides that need to be examined. The number of columns can also be changed. The sample order will be in either numerical

or alphabetical order. Visualization is presented as chromatograms that show the relationship between ions in multiple spectral acquisitions of the same peptide.

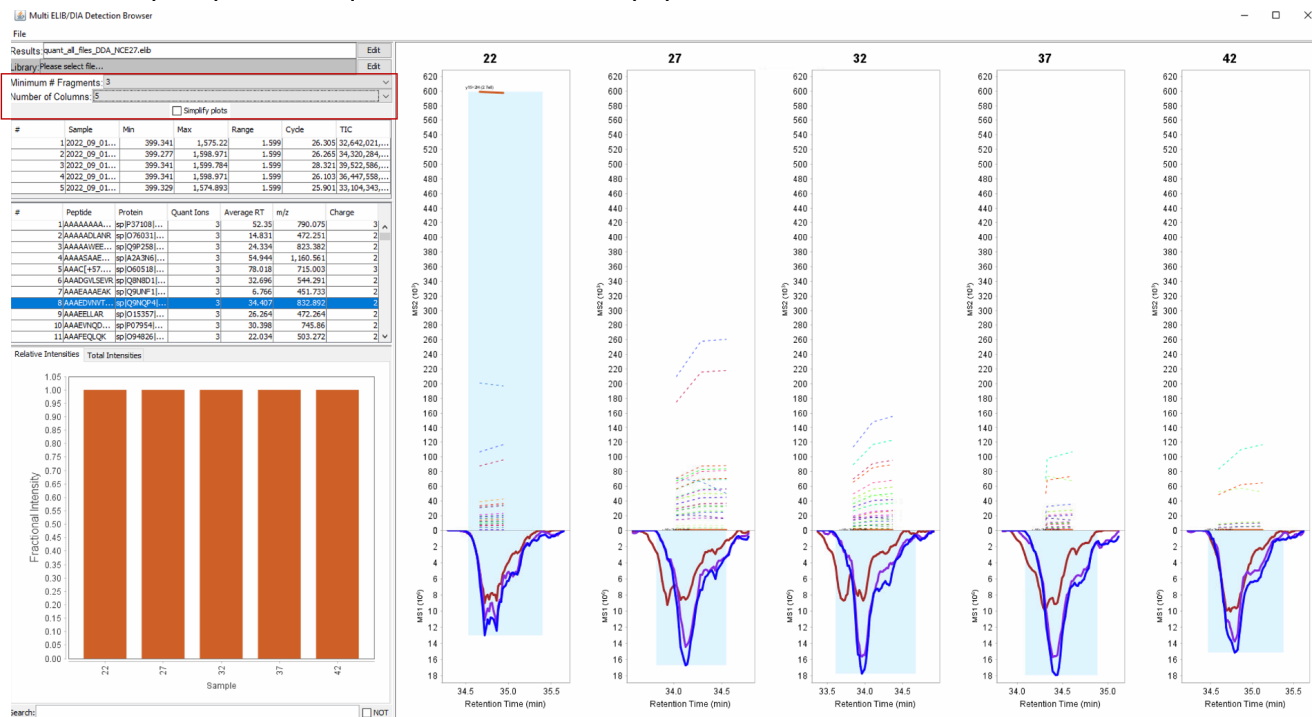

Similar to the ELIB browser, you can search for specific peptides, or click through the list of detections:

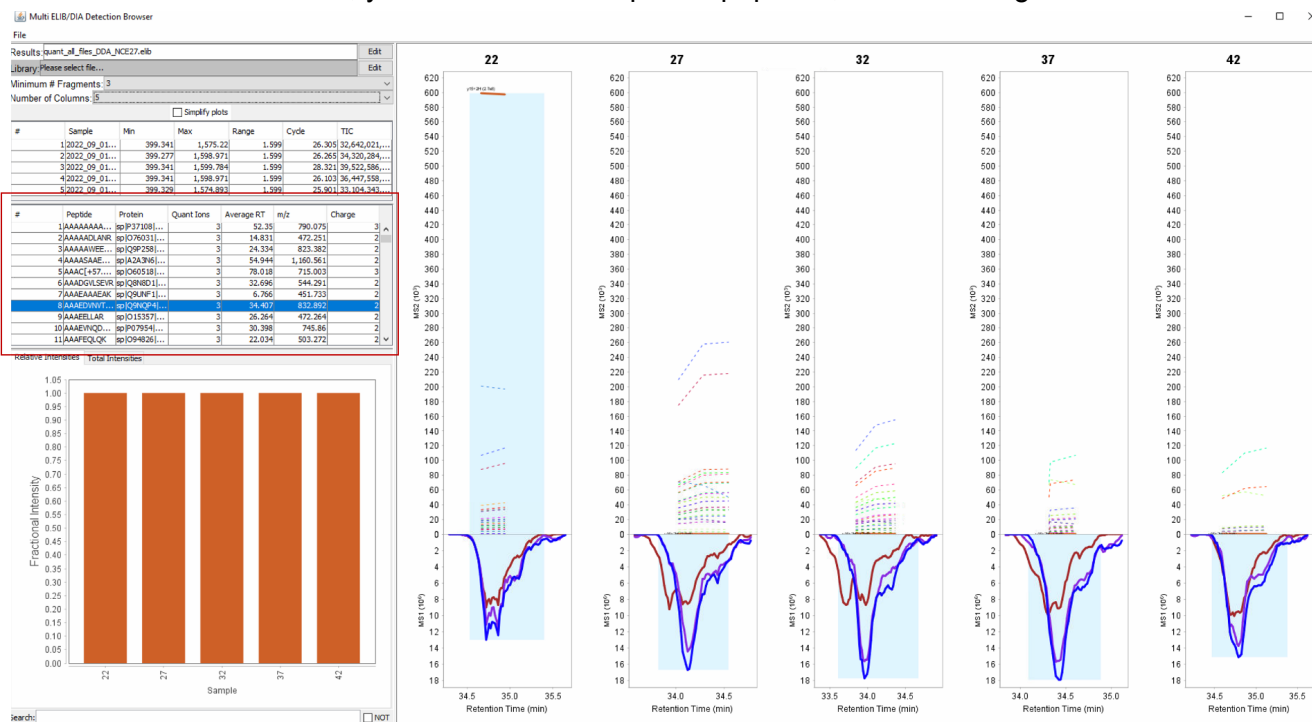

In the lower left panel, there are intensity bar graphs for “Relative Intensities” and “Total Intensities” across samples. Scribe uses precursors for quantitation, therefore the “Relative Intensities” bar graph will always consist of the intensity values for a single precursor across all samples. “Total Intensities” will allow you to compare quantitative intensities across samples. Below are both graphs for the peptide selected in the screenshot above.

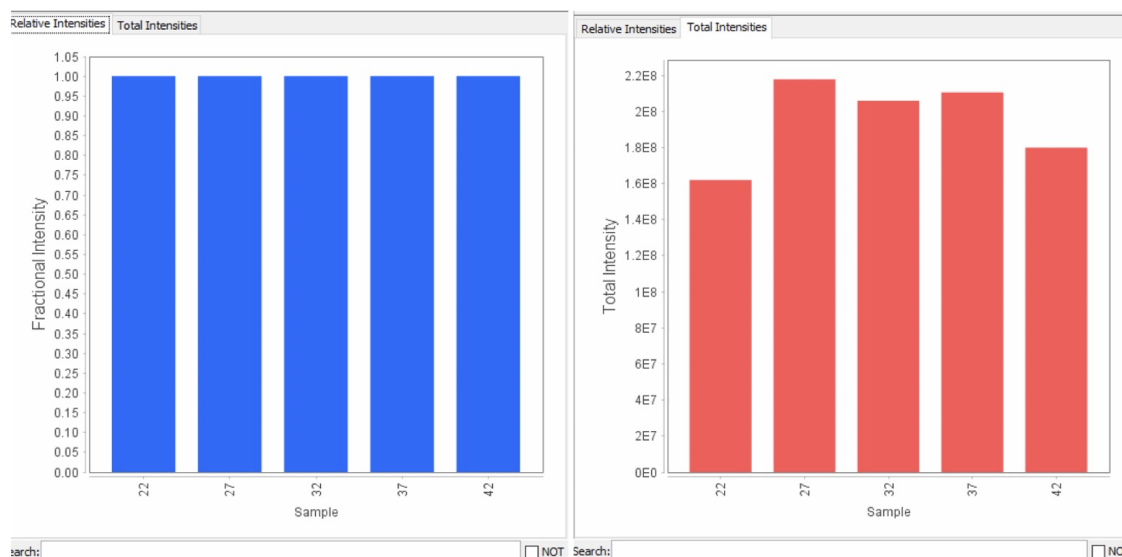

## Raw File Browser

“Launch raw File Browser” will allow you to visualize samples, in mzML format. In this view, you can visualize unsearched data. The data is present in scans, allowing you to visualize the MS1 and MS2 spectra for specific scans throughout your injection

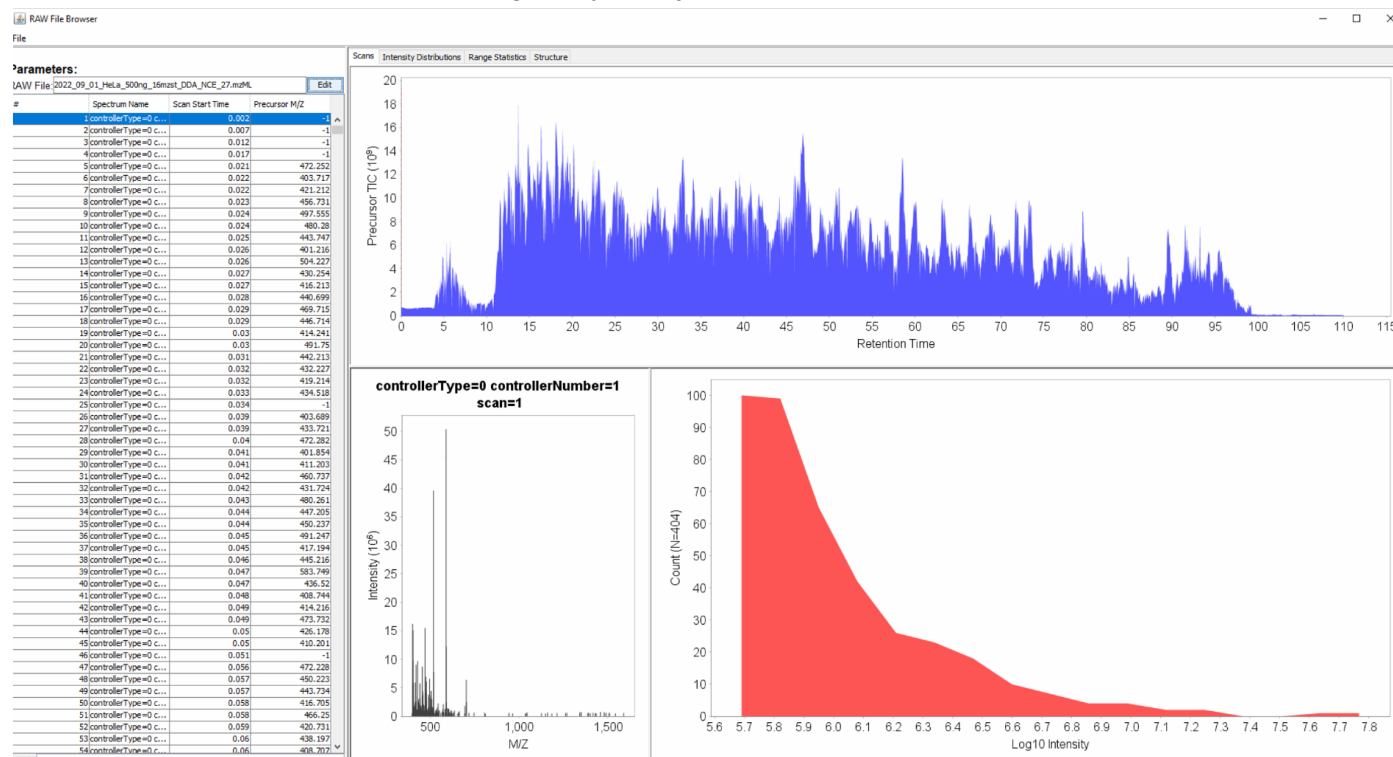



The next tab contains intensity distributions for precursor and fragment ions present in each scan in the bottom pane. In the top pane, you can see the base peak chromatogram trace.

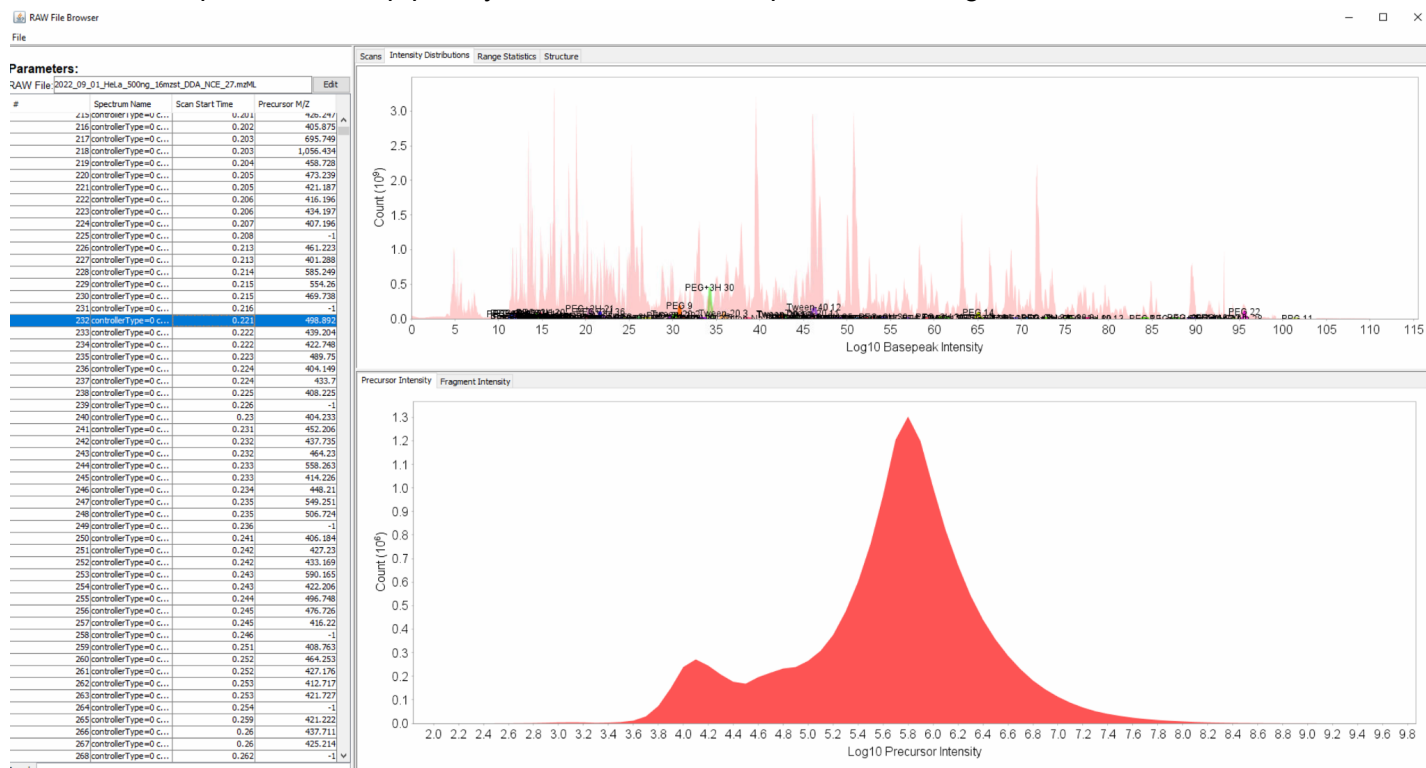

Contaminant peaks from common molecules, such as PEG, triton, tween and polysiloxane are present in the base peak trace. If you look in the screenshot below, you will see PEG +3H 30 base peak present in the chromatogram around 34.5 minutes.

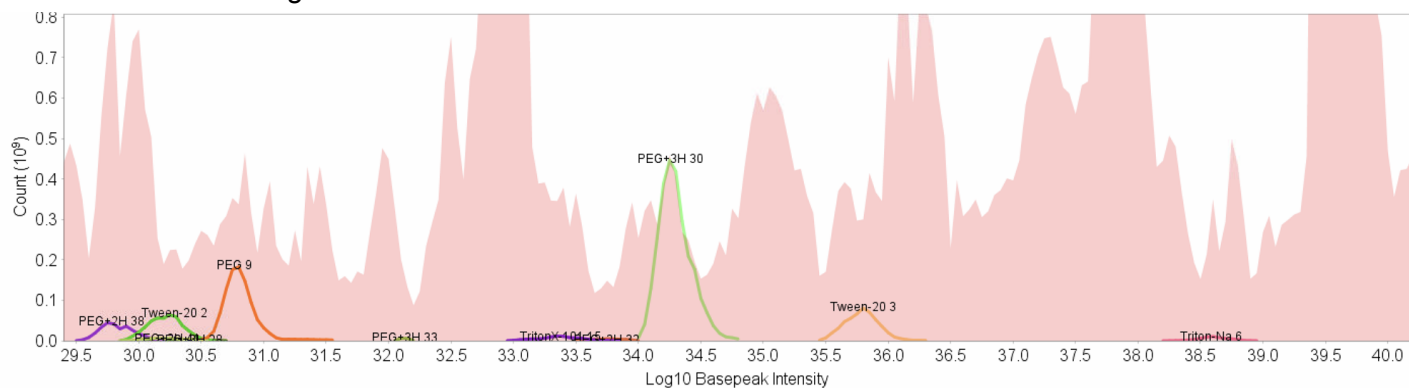

Peptide Browser

“Launch Peptide Browser” will allow you to search for a specific peptide in a sample file of interest. When you first open this browser, the peptide “VATVSLPR”, a common tryptic peptide, is selected. The top left panel displays the chromatogram trace for this peptide across the entire gradient. The bottom left panel shows the XCorr score across the gradient. You should see the highest score where the most intense peak is for the peptide. On the right side of the screen are the scans throughout the gradient. Visualization is presented as chromatograms that show the relationship between ions in multiple spectral acquisitions of the same peptide.

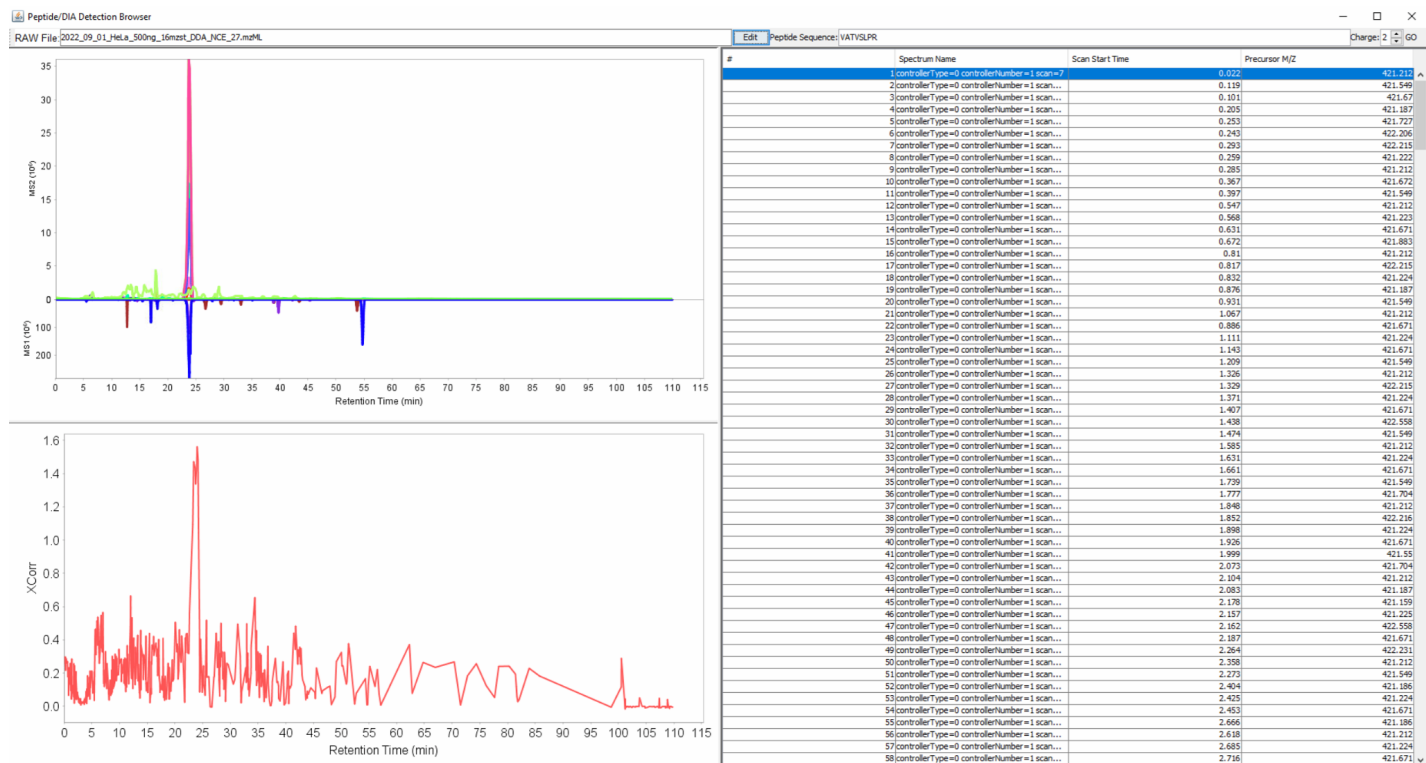

In this next view, the base peak has been zoomed in under the chromatogram panel in the top left. You can see this peak elutes around 23.8 min. A scan acquired at 23.737 min has been selected to pull up the MS2 spectra in the bottom-right corner.

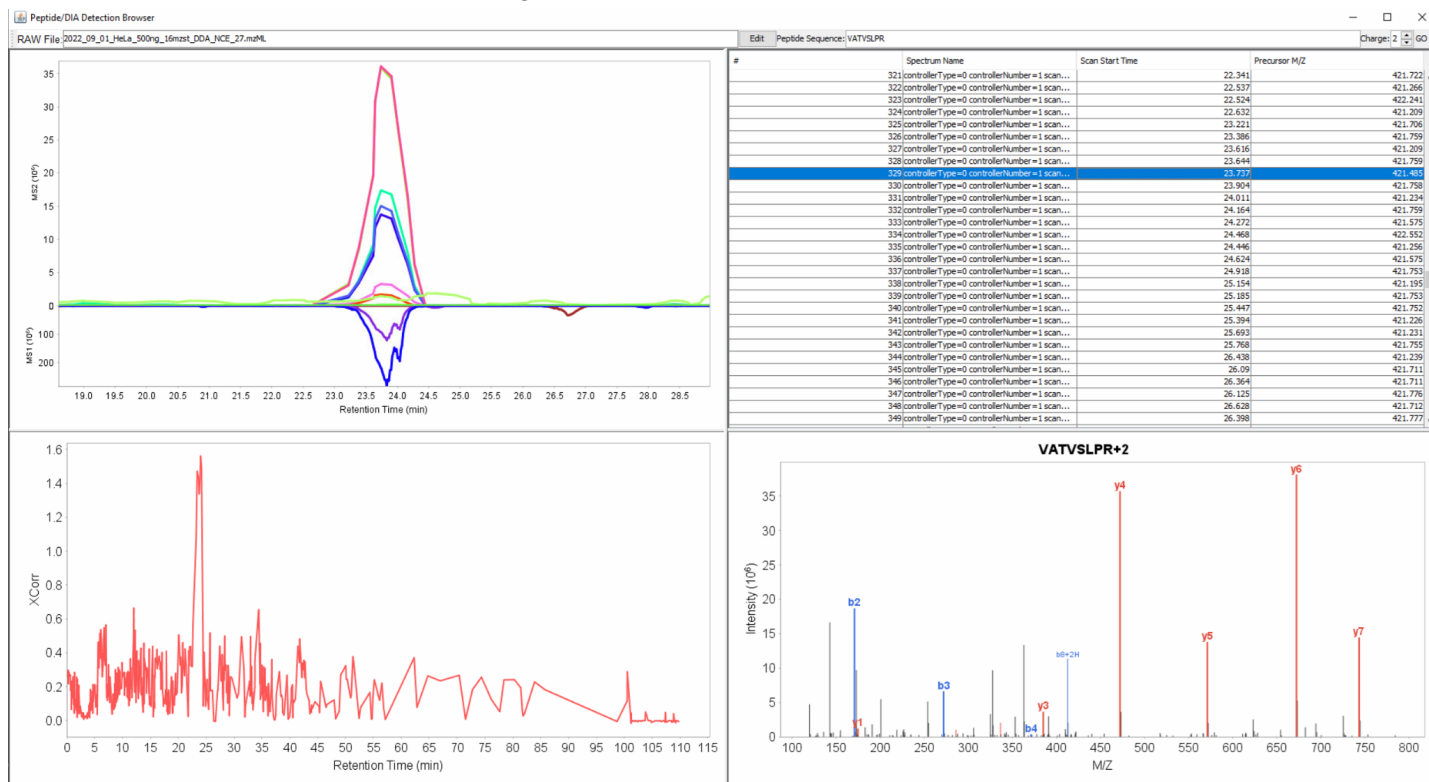

## Feature Browser

“Launch feature browser” will allow you to visualize the features.txt files output from Scribe or EncyclopeDIA. The tabs of the features browser contain various metrics used in matching predicted spectra to peptides. Below is a screenshot of the ROC plot, which shows the performance of the 13 features available through this browser. On the x-axis is the Q-value, or the chances of a given feature resulting in a false positive rate (FPR). On the y-axis are counts, indicating the number of peptides detected at a given FPR. Features that are lower on the curve have worse performance than features higher on the curve. For example, “ms2MassError,” denoted by the dark blue line, performs the worse of the given characteristics and is only useful as a correction factor in this case.

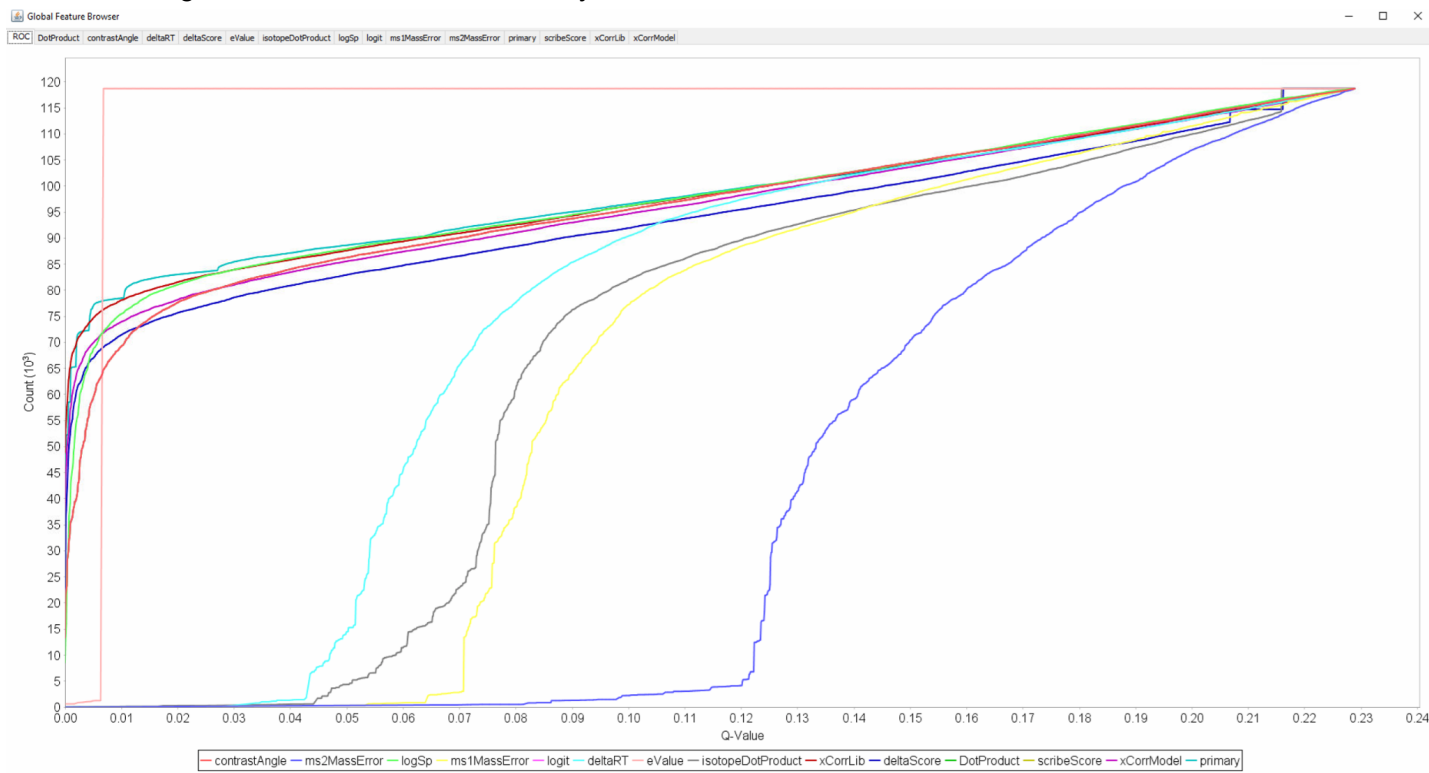

Each of the other tabs contains histograms of the individual scores for target and decoy peptides. For example, below is the dot product plot where a value closer to 1 indicates greater similarity between the actual and predicted spectra. In this plot, you should see the decoy trace (in red) reside lower than the target trace (in blue).

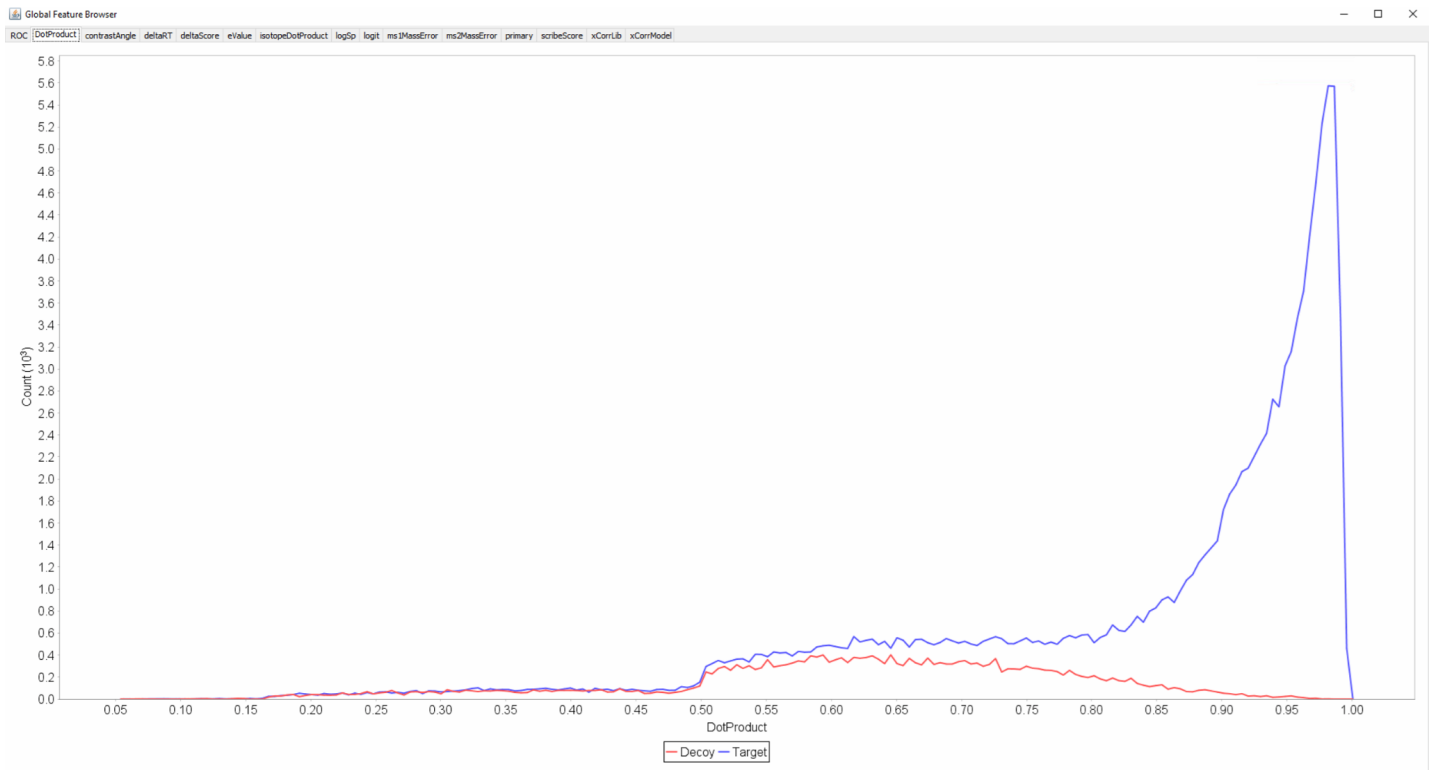

For the remaining features, you should also see the target trace (blue) relative to the decoy trace (red). This indicates the target spectra are performing better than the decoy spectra, which should occur when a peptide match is matched correctly.

### C. Analyzing text files using Microsoft Excel

After saving a quant report, Scribe will perform a match-between-runs quantitation of all samples you obtained and then write a protein and peptide report. These are formatted as expression datasets of the proteins or peptides detected. This expression dataset allows you to use Open the text file in Excel by right-clicking on the file, open with excel. The following example shows how to process the protein reports for HeLa DDA injections at varying NCE processed against a library optimized against NCE = 27. Within this example, the file was “saved as” .XLS file to ensure that the equations are saved. Below is a screenshot of the file once it has been opened.

AutoSave OFF

quant\_all\_files\_DDA\_NCE27.elibunnormalized.proteins

HomeInsertDrawPage LayoutFormulasDataReviewViewAutomateAdd-insTell me

CommentsShare

Paste

Calibri (Body)12A<sup>+</sup>A<sup>-</sup>

BBIU

General

\$% ,10000

Conditional FormattingFormat as TableCell Styles

InsertDeleteFormat

Σ

Sort & FilterFind & Select

Analyze DataSensitivity

Possible Data Loss

Some features may be lost if you save this workbook in the text (.txt) format. To preserve these features, save it in an Excel file format.

Save As...

A1

✕

✕

fx

Protein

|    | A         | B          | C           | D          | E          | F          | G          | H          | I          | J          | K                                 | L | M | N | O | P | Q | R | S | T | U |
|----|-----------|------------|-------------|------------|------------|------------|------------|------------|------------|------------|-----------------------------------|---|---|---|---|---|---|---|---|---|---|
| 1  | Protein   | NumPeptide | PeptideSeq  | 2022_09_01 | 2022_09_01 | 2022_09_01 | 2022_09_01 | 2022_09_01 | 2022_09_01 | 2022_09_01 | HeLa_500ng_16mzst_DDA_NCE_42.mzML |   |   |   |   |   |   |   |   |   |   |
| 2  | sp Q5J541 | 1          | YDSIPVSTLL  | 2.89E+07   | 3.29E+07   | 4.38E+07   | 4.09E+07   | 3.20E+07   |            |            |                                   |   |   |   |   |   |   |   |   |   |   |
| 3  | sp Q00637 | 50         | AALSEEEK    | 2.95E+10   | 2.94E+10   | 3.75E+10   | 3.31E+10   | 3.36E+10   |            |            |                                   |   |   |   |   |   |   |   |   |   |   |
| 4  | sp P08195 | 24         | ADLLSTQPG   | 1.78E+10   | 2.00E+10   | 2.17E+10   | 2.10E+10   | 1.82E+10   |            |            |                                   |   |   |   |   |   |   |   |   |   |   |
| 5  | sp Q9UHB9 | 18         | ALLQQQPED   | 1.25E+09   | 1.45E+09   | 1.42E+09   | 1.51E+09   | 1.08E+09   |            |            |                                   |   |   |   |   |   |   |   |   |   |   |
| 6  | sp P07237 | 28         | ALAPYAKDK   | 2.22E+10   | 2.36E+10   | 2.65E+10   | 2.47E+10   | 2.34E+10   |            |            |                                   |   |   |   |   |   |   |   |   |   |   |
| 7  | sp Q6NUM9 | 10         | ATVQSVLLDS  | 5.67E+08   | 7.21E+08   | 8.01E+08   | 7.77E+08   | 5.43E+08   |            |            |                                   |   |   |   |   |   |   |   |   |   |   |
| 8  | sp Q13131 | 6          | FECL+57.021 | 3.00E+08   | 3.75E+08   | 3.94E+08   | 4.05E+08   | 3.00E+08   |            |            |                                   |   |   |   |   |   |   |   |   |   |   |
| 9  | sp Q09666 | 271        | ADIDSGPNV   | 1.02E+11   | 1.08E+11   | 1.21E+11   | 1.17E+11   | 9.81E+10   |            |            |                                   |   |   |   |   |   |   |   |   |   |   |
| 10 | sp Q13151 | 6          | EDIYSGGGG   | 1.70E+09   | 1.76E+09   | 1.97E+09   | 1.95E+09   | 1.66E+09   |            |            |                                   |   |   |   |   |   |   |   |   |   |   |
| 11 | sp P31150 | 19         | DWNVVDUPK   | 4.19E+09   | 4.82E+09   | 5.60E+09   | 5.15E+09   | 4.26E+09   |            |            |                                   |   |   |   |   |   |   |   |   |   |   |
| 12 | sp Q01813 | 26         | AMEWITAKV   | 7.65E+09   | 6.37E+09   | 8.18E+09   | 9.46E+09   | 6.67E+09   |            |            |                                   |   |   |   |   |   |   |   |   |   |   |
| 13 | sp Q9H3P7 | 10         | DC+57.0214  | 3.55E+08   | 4.17E+08   | 5.34E+08   | 4.37E+08   | 3.17E+08   |            |            |                                   |   |   |   |   |   |   |   |   |   |   |
| 14 | sp O15213 | 9          | ALAEVDISU   | 7.21E+08   | 8.28E+08   | 9.90E+08   | 8.96E+08   | 7.67E+08   |            |            |                                   |   |   |   |   |   |   |   |   |   |   |
| 15 | sp Q8N9T8 | 13         | AQEEADYIEV  | 1.59E+09   | 1.54E+09   | 1.60E+09   | 1.41E+09   | 1.40E+09   |            |            |                                   |   |   |   |   |   |   |   |   |   |   |
| 16 | sp P20290 | 9          | APLATGEDDI  | 2.61E+09   | 3.90E+09   | 3.18E+09   | 2.51E+09   | 2.38E+09   |            |            |                                   |   |   |   |   |   |   |   |   |   |   |
| 17 | sp Q9NWV8 | 7          | AVGAQASVC   | 1.59E+09   | 1.75E+09   | 2.13E+09   | 1.74E+09   | 1.72E+09   |            |            |                                   |   |   |   |   |   |   |   |   |   |   |
| 18 | sp P49419 | 27         | DLPLAQGIKE  | 5.78E+09   | 6.55E+09   | 6.92E+09   | 6.77E+09   | 5.63E+09   |            |            |                                   |   |   |   |   |   |   |   |   |   |   |
| 19 | sp Q96E11 | 10         | DTVSEDTIR   | 2.05E+09   | 2.51E+09   | 2.66E+09   | 2.22E+09   | 1.99E+09   |            |            |                                   |   |   |   |   |   |   |   |   |   |   |
| 20 | sp Q13813 | 137        | ADVVESWG    | 3.06E+10   | 3.15E+10   | 3.84E+10   | 3.56E+10   | 3.17E+10   |            |            |                                   |   |   |   |   |   |   |   |   |   |   |
| 21 | sp P62873 | 9          | AC+57.0214  | 1.44E+09   | 1.59E+09   | 1.52E+09   | 1.52E+09   | 1.40E+09   |            |            |                                   |   |   |   |   |   |   |   |   |   |   |
| 22 | sp P42765 | 19         | AANDAGYFN   | 6.54E+09   | 6.90E+09   | 7.28E+09   | 7.06E+09   | 6.69E+09   |            |            |                                   |   |   |   |   |   |   |   |   |   |   |
| 23 | sp Q92616 | 96         | AASQSTQVP   | 1.83E+10   | 1.88E+10   | 2.11E+10   | 2.04E+10   | 1.73E+10   |            |            |                                   |   |   |   |   |   |   |   |   |   |   |
| 24 | sp Q99832 | 30         | ALIEIPRATIS | 1.46E+10   | 1.54E+10   | 1.74E+10   | 1.61E+10   | 1.52E+10   |            |            |                                   |   |   |   |   |   |   |   |   |   |   |
| 25 | sp Q9BWMV | 15         | AGVVTPGITE  | 2.89E+09   | 3.30E+09   | 3.65E+09   | 3.83E+09   | 2.71E+09   |            |            |                                   |   |   |   |   |   |   |   |   |   |   |
| 26 | sp Q14980 | 82         | AADALEEQQ   | 1.30E+10   | 1.37E+10   | 1.72E+10   | 1.49E+10   | 1.42E+10   |            |            |                                   |   |   |   |   |   |   |   |   |   |   |
| 27 | sp Q9Y263 | 28         | AINC+57.02  | 3.28E+09   | 3.25E+09   | 3.88E+09   | 3.92E+09   | 3.18E+09   |            |            |                                   |   |   |   |   |   |   |   |   |   |   |
| 28 | sp Q8WY22 | 3          | SSPSGSPNS   | 1.24E+09   | 8.03E+08   | 1.68E+09   | 1.14E+09   | 1.39E+09   |            |            |                                   |   |   |   |   |   |   |   |   |   |   |
| 29 | sp P60891 | 4          | ENISEWRFS   | 7.40E+08   | 7.61E+08   | 8.84E+08   | 9.39E+08   | 7.82E+08   |            |            |                                   |   |   |   |   |   |   |   |   |   |   |
| 30 | sp Q75489 | 10         | AANWYERD    | 1.30E+09   | 1.50E+09   | 1.85E+09   | 1.51E+09   | 1.19E+09   |            |            |                                   |   |   |   |   |   |   |   |   |   |   |
| 31 | sp Q8NF37 | 6          | AAPASSAGA   | 1.29E+09   | 1.47E+09   | 1.52E+09   | 1.43E+09   | 1.33E+09   |            |            |                                   |   |   |   |   |   |   |   |   |   |   |
| 32 | sp P56192 | 31         | AEVLSTVGP   | 1.00E+10   | 1.26E+10   | 1.45E+10   | 1.31E+10   | 1.11E+10   |            |            |                                   |   |   |   |   |   |   |   |   |   |   |
| 33 | sp P30084 | 18         | AFAGADIK    | 8.32E+09   | 8.84E+09   | 9.35E+09   | 9.24E+09   | 8.07E+09   |            |            |                                   |   |   |   |   |   |   |   |   |   |   |

quant\_all\_files\_DDA\_NCE27.elib

+

Ready

</

Add column annotations to describe the sample names/conditions for each injection. In this example, NCE was added as an annotation row.

|    | A           | B          | C               | D          | E          | F          | G          | H          | I                     | J           | K | L | M | N | O | P | Q | R | S | T | U | V |
|----|-------------|------------|-----------------|------------|------------|------------|------------|------------|-----------------------|-------------|---|---|---|---|---|---|---|---|---|---|---|---|
| 1  | Protein     | NumPeptide | PeptideSequence | 2022_09_01 | 2022_09_01 | 2022_09_01 | 2022_09_01 | 2022_09_01 | HeLa_500ng_16mzst_DDA | NCE_42.mzML |   |   |   |   |   |   |   |   |   |   |   |   |
| 2  | NCE         |            |                 | 22         | 27         | 32         | 37         | 42         |                       |             |   |   |   |   |   |   |   |   |   |   |   |   |
| 3  | sp Q5J554 f | 1          | YDSIPVSTSL      | 2.89E+07   | 3.29E+07   | 4.38E+07   | 4.09E+07   | 3.20E+07   |                       |             |   |   |   |   |   |   |   |   |   |   |   |   |
| 4  | sp Q04637 f | 50         | AALSEEELEK      | 2.95E+10   | 2.94E+10   | 3.75E+10   | 3.31E+10   | 3.36E+10   |                       |             |   |   |   |   |   |   |   |   |   |   |   |   |
| 5  | sp P08195 f | 24         | ADLLSTQPG       | 1.78E+10   | 2.00E+10   | 2.17E+10   | 2.10E+10   | 1.82E+10   |                       |             |   |   |   |   |   |   |   |   |   |   |   |   |
| 6  | sp Q9UHB9 f | 18         | ALLQQQPED       | 1.25E+09   | 1.45E+09   | 1.42E+09   | 1.51E+09   | 1.08E+09   |                       |             |   |   |   |   |   |   |   |   |   |   |   |   |
| 7  | sp P07237 f | 28         | ALAPEYAKD       | 2.22E+10   | 2.36E+10   | 2.65E+10   | 2.47E+10   | 2.34E+10   |                       |             |   |   |   |   |   |   |   |   |   |   |   |   |
| 8  | sp Q6NUM9 f | 10         | ATVQSVLLD       | 5.67E+08   | 7.21E+08   | 8.01E+08   | 7.77E+08   | 5.43E+08   |                       |             |   |   |   |   |   |   |   |   |   |   |   |   |
| 9  | sp Q13131 f | 6          | FEQ(+57.02)     | 3.00E+08   | 3.75E+08   | 3.94E+08   | 4.05E+08   | 3.00E+08   |                       |             |   |   |   |   |   |   |   |   |   |   |   |   |
| 10 | sp Q09666 f | 271        | ADQISGPNV       | 1.02E+11   | 1.08E+11   | 1.21E+11   | 1.17E+11   | 9.81E+10   |                       |             |   |   |   |   |   |   |   |   |   |   |   |   |
| 11 | sp Q13151 f | 6          | EDYSGGGG        | 1.70E+09   | 1.76E+09   | 1.97E+09   | 1.95E+09   | 1.66E+09   |                       |             |   |   |   |   |   |   |   |   |   |   |   |   |
| 12 | sp P31150 f | 19         | DWNVOLUPK       | 4.19E+09   | 4.82E+09   | 5.60E+09   | 5.15E+09   | 4.26E+09   |                       |             |   |   |   |   |   |   |   |   |   |   |   |   |
| 13 | sp Q01813 f | 26         | AMEWITAK        | 7.65E+09   | 6.37E+09   | 8.18E+09   | 9.46E+09   | 6.67E+09   |                       |             |   |   |   |   |   |   |   |   |   |   |   |   |
| 14 | sp Q9H3P7 f | 10         | DC(+57.0214)    | 3.55E+08   | 4.17E+08   | 5.34E+08   | 4.37E+08   | 3.17E+08   |                       |             |   |   |   |   |   |   |   |   |   |   |   |   |
| 15 | sp Q15213 f | 9          | ALAEVDVSL       | 7.21E+08   | 8.28E+08   | 9.90E+08   | 8.96E+08   | 7.67E+08   |                       |             |   |   |   |   |   |   |   |   |   |   |   |   |
| 16 | sp Q8N9T8 f | 13         | AQEEADYIEV      | 1.59E+09   | 1.54E+09   | 1.60E+09   | 1.41E+09   | 1.40E+09   |                       |             |   |   |   |   |   |   |   |   |   |   |   |   |
| 17 | sp P20290 f | 9          | APLATGEDD       | 2.61E+09   | 3.90E+09   | 3.18E+09   | 2.51E+09   | 2.38E+09   |                       |             |   |   |   |   |   |   |   |   |   |   |   |   |
| 18 | sp Q9NVV8 f | 7          | AVGAQASVC       | 1.59E+09   | 1.75E+09   | 2.13E+09   | 1.74E+09   | 1.72E+09   |                       |             |   |   |   |   |   |   |   |   |   |   |   |   |
| 19 | sp P49419 f | 27         | DLPLAQGIK       | 5.78E+09   | 6.55E+09   | 6.92E+09   | 6.77E+09   | 5.63E+09   |                       |             |   |   |   |   |   |   |   |   |   |   |   |   |
| 20 | sp Q96E11 f | 10         | DTVSEDTIR       | 2.05E+09   | 2.51E+09   | 2.66E+09   | 2.22E+09   | 1.99E+09   |                       |             |   |   |   |   |   |   |   |   |   |   |   |   |
| 21 | sp Q13813 f | 137        | ADVVESWIG       | 3.06E+10   | 3.15E+10   | 3.84E+10   | 3.56E+10   | 3.17E+10   |                       |             |   |   |   |   |   |   |   |   |   |   |   |   |
| 22 | sp P62873 f | 9          | AC(+57.0214)    | 1.44E+09   | 1.59E+09   | 1.52E+09   | 1.52E+09   | 1.40E+09   |                       |             |   |   |   |   |   |   |   |   |   |   |   |   |
| 23 | sp P42765 f | 19         | AANDAGYFN       | 6.54E+09   | 6.90E+09   | 7.28E+09   | 7.06E+09   | 6.69E+09   |                       |             |   |   |   |   |   |   |   |   |   |   |   |   |
| 24 | sp Q92616 f | 96         | AASQSTQVP       | 1.83E+10   | 1.88E+10   | 2.11E+10   | 2.04E+10   | 1.73E+10   |                       |             |   |   |   |   |   |   |   |   |   |   |   |   |
| 25 | sp Q99832 f | 30         | ALEIIPRATIS     | 1.46E+10   | 1.54E+10   | 1.74E+10   | 1.61E+10   | 1.52E+10   |                       |             |   |   |   |   |   |   |   |   |   |   |   |   |
| 26 | sp Q9BWM f  | 15         | AGVVTPTGITE     | 2.89E+09   | 3.30E+09   | 3.65E+09   | 3.83E+09   | 2.71E+09   |                       |             |   |   |   |   |   |   |   |   |   |   |   |   |
| 27 | sp Q14980 f | 82         | AADALEEQQ       | 1.30E+10   | 1.37E+10   | 1.72E+10   | 1.49E+10   | 1.42E+10   |                       |             |   |   |   |   |   |   |   |   |   |   |   |   |
| 28 | sp Q9Y263 f | 28         | AINC(+57.02)    | 3.28E+09   | 3.25E+09   | 3.88E+09   | 3.92E+09   | 3.18E+09   |                       |             |   |   |   |   |   |   |   |   |   |   |   |   |
| 29 | sp Q8WY22 f | 3          | SSPSGSPNPS      | 1.24E+09   | 8.03E+08   | 1.68E+09   | 1.14E+09   | 1.39E+09   |                       |             |   |   |   |   |   |   |   |   |   |   |   |   |
| 30 | sp P60891 f | 4          | ENISEWRJFS      | 7.40E+08   | 7.61E+08   | 8.84E+08   | 9.39E+08   | 7.82E+08   |                       |             |   |   |   |   |   |   |   |   |   |   |   |   |
| 31 | sp Q75489 f | 10         | AANWYERD        | 1.30E+09   | 1.50E+09   | 1.85E+09   | 1.51E+09   | 1.19E+09   |                       |             |   |   |   |   |   |   |   |   |   |   |   |   |
| 32 | sp Q8NF37 f | 6          | AAPASSAGA       | 1.29E+09   | 1.47E+09   | 1.52E+09   | 1.43E+09   | 1.33E+09   |                       |             |   |   |   |   |   |   |   |   |   |   |   |   |
| 33 | sp P56192 f | 31         | AEVLSTVGP       | 1.00E+10   | 1.26E+10   | 1.45E+10   | 1.31E+10   | 1.11E+10   |                       |             |   |   |   |   |   |   |   |   |   |   |   |   |
| 34 | sp P30084 f | 18         | AFAAGADIK       | 8.32E+09   | 8.84E+09   | 9.35E+09   | 9.24E+09   | 8.07E+09   |                       |             |   |   |   |   |   |   |   |   |   |   |   |   |
| 35 | sp Q9BZK7 f | 9          | EGGQDVPSN       | 5.77E+08   | 5.97E+08   | 7.08E+08   | 6.70E+08   | 5.18E+08   |                       |             |   |   |   |   |   |   |   |   |   |   |   |   |
| 36 | sp Q9H0A0 f | 33         | AGFVPVYLR       | 4.09E+09   | 4.12E+09   | 4.45E+09   | 4.20E+09   | 3.80E+09   |                       |             |   |   |   |   |   |   |   |   |   |   |   |   |
| 37 | sp A2A3N6 f | 7          | AAAASAAEA       | 6.98E+08   | 7.31E+08   | 8.96E+08   | 8.97E+08   | 8.39E+08   |                       |             |   |   |   |   |   |   |   |   |   |   |   |   |
| 38 | sp Q9NX24 f | 4          | ADPDGPEAQ       | 8.86E+08   | 9.51E+08   | 1.12E+09   | 1.10E+09   | 8.85E+08   |                       |             |   |   |   |   |   |   |   |   |   |   |   |   |
| 39 | sp P55809 f | 16         | AGGAGVPAF       | 3.12E+09   | 3.87E+09   | 4.38E+09   | 4.34E+09   | 3.42E+09   |                       |             |   |   |   |   |   |   |   |   |   |   |   |   |
| 40 | sp P25490 f | 7          | DIDHETVVEE      | 3.37E+08   | 5.50E+08   | 4.02E+08   | 4.27E+08   | 3.26E+08   |                       |             |   |   |   |   |   |   |   |   |   |   |   |   |
| 41 | sp P42166 f | 28         | ALEESESSQL      | 6.03E+09   | 6.95E+09   | 8.64E+09   | 7.72E+09   | 6.22E+09   |                       |             |   |   |   |   |   |   |   |   |   |   |   |   |

In excel, sort values in increasing order. For example, in HeLa, a mammalian immortalized cancer cell line, the most abundant proteins are often metabolic enzymes (G3P) or filament proteins (ACTB).



| quant_all_files_DDA_NCE27.elib_unnormalized.proteins                                              |                     |            |             |            |            |            |            |            |            |            |            |            |            |            |            |            |            |            |
|---------------------------------------------------------------------------------------------------|---------------------|------------|-------------|------------|------------|------------|------------|------------|------------|------------|------------|------------|------------|------------|------------|------------|------------|------------|
| Home Insert Draw Page Layout Formulas Data Review View Automate Add-ins Tell me                   |                     |            |             |            |            |            |            |            |            |            |            |            |            |            |            |            |            |            |
| Calibri (Body) 12                                                                                 |                     |            |             |            |            |            |            |            |            |            |            |            |            |            |            |            |            |            |
| General Conditional Formatting Insert Delete Sort & Filter Find & Select Analyze Data Sensitivity |                     |            |             |            |            |            |            |            |            |            |            |            |            |            |            |            |            |            |
| A11 fx sp P04406 G3P_HUMAN                                                                        |                     |            |             |            |            |            |            |            |            |            |            |            |            |            |            |            |            |            |
|                                                                                                   | A                   | B          | C           | D          | E          | F          | G          | H          | I          | J          | K          | L          | M          | N          | O          | P          | Q          | R          |
| 1                                                                                                 | Protein             | NumPeptide | PeptideSequ | 2022_09_01 | 2022_09_01 | 2022_09_01 | 2022_09_01 | 2022_09_01 | 2022_09_01 | 2022_09_01 | 2022_09_01 | 2022_09_01 | 2022_09_01 | 2022_09_01 | 2022_09_01 | 2022_09_01 | 2022_09_01 | 2022_09_01 |
| 2                                                                                                 | NCE                 |            |             | 22         | 27         | 32         | 37         | 42         |            |            |            |            |            |            |            |            |            |            |
| 3                                                                                                 | sp P60709 ACTB_HUM  | 22         | C[+57.02146 | 3.03E+11   | 3.43E+11   | 3.92E+11   | 3.61E+11   | 2.91E+11   |            |            |            |            |            |            |            |            |            |            |
| 4                                                                                                 | sp P68104 EF1A1_HUN | 18         | EHALLAYTLG  | 1.93E+11   | 1.98E+11   | 2.36E+11   | 2.21E+11   | 2.03E+11   |            |            |            |            |            |            |            |            |            |            |
| 5                                                                                                 | sp P06733 ENO4_HUM  | 31         | AAVPSGAST   | 1.68E+11   | 1.94E+11   | 2.35E+11   | 2.03E+11   | 1.83E+11   |            |            |            |            |            |            |            |            |            |            |
| 6                                                                                                 | sp P04908 H2A1B_HUM | 5          | AGLQFPVGR   | 1.88E+11   | 1.82E+11   | 2.73E+11   | 1.77E+11   | 2.15E+11   |            |            |            |            |            |            |            |            |            |            |
| 7                                                                                                 | sp P14618 KPYM_HUM  | 39         | AEGSDVANA   | 1.75E+11   | 1.80E+11   | 2.13E+11   | 1.89E+11   | 1.75E+11   |            |            |            |            |            |            |            |            |            |            |
| 8                                                                                                 | sp P68431 H31_HUMA  | 6          | EIAQDFKQL   | 1.69E+11   | 1.76E+11   | 2.09E+11   | 2.03E+11   | 1.84E+11   |            |            |            |            |            |            |            |            |            |            |
| 9                                                                                                 | sp P05787 K2C8_HUM  | 42         | AEAESMYQI   | 1.39E+11   | 1.54E+11   | 1.67E+11   | 1.54E+11   | 1.41E+11   |            |            |            |            |            |            |            |            |            |            |
| 10                                                                                                | sp Q92621 NU205_HU  | 40         | AQIEQVIANC  | 5.52E+10   | 1.47E+11   | 1.76E+11   | 1.73E+11   | 1.46E+11   |            |            |            |            |            |            |            |            |            |            |
| 11                                                                                                | sp P04406 G3P_HUMA  | 25         | GALQNIIPAS  | 1.30E+11   | 1.43E+11   | 1.55E+11   | 1.44E+11   | 1.27E+11   |            |            |            |            |            |            |            |            |            |            |
| 12                                                                                                | sp P07900 HS90A_HUM | 46         | ADLNNLGLT   | 1.20E+11   | 1.34E+11   | 1.43E+11   | 1.40E+11   | 1.19E+11   |            |            |            |            |            |            |            |            |            |            |
| 13                                                                                                | sp P78527 PRKDC_HUM | 198        | AALSALSFLL  | 1.26E+11   | 1.30E+11   | 1.48E+11   | 1.40E+11   | 1.29E+11   |            |            |            |            |            |            |            |            |            |            |
| 14                                                                                                | sp P00558 PGK1_HUM  | 36         | AC[+57.0214 | 1.23E+11   | 1.30E+11   | 1.50E+11   | 1.43E+11   | 1.26E+11   |            |            |            |            |            |            |            |            |            |            |
| 15                                                                                                | sp P55060 XPO2_HUM  | 46         | AAC[+57.021 | 1.15E+11   | 1.23E+11   | 1.76E+11   | 1.66E+11   | 1.17E+11   |            |            |            |            |            |            |            |            |            |            |
| 16                                                                                                | sp P62805 H4_HUMAN  | 11         | DAVITYTEHA  | 9.66E+10   | 1.16E+11   | 1.33E+11   | 1.24E+11   | 1.14E+11   |            |            |            |            |            |            |            |            |            |            |
| 17                                                                                                | sp P10412 H14_HUMA  | 5          | ALAAAGYDV   | 9.42E+10   | 1.12E+11   | 1.19E+11   | 1.11E+11   | 8.55E+10   |            |            |            |            |            |            |            |            |            |            |
| 18                                                                                                | sp Q09666 AHNK_HUM  | 271        | ADIDISGPNV  | 1.02E+11   | 1.08E+11   | 1.21E+11   | 1.17E+11   | 9.81E+10   |            |            |            |            |            |            |            |            |            |            |
| 19                                                                                                | sp P00338 LDHA_HUM  | 20         | DDVFLSPVCI  | 8.98E+10   | 1.03E+11   | 1.08E+11   | 1.08E+11   | 9.79E+10   |            |            |            |            |            |            |            |            |            |            |
| 20                                                                                                | sp P21333 FLNA_HUM  | 122        | AEAGVPAEF   | 8.78E+10   | 1.02E+11   | 1.15E+11   | 1.09E+11   | 9.46E+10   |            |            |            |            |            |            |            |            |            |            |
| 21                                                                                                | sp P05783 K1C18_HUM | 33         | AQIFANTVDI  | 1.00E+11   | 9.71E+10   | 1.05E+11   | 9.88E+10   | 9.95E+10   |            |            |            |            |            |            |            |            |            |            |
| 22                                                                                                | sp O60814 H2B1K_HUM | 8          | AMGIMNSFV   | 9.36E+10   | 9.70E+10   | 1.21E+11   | 1.10E+11   | 1.08E+11   |            |            |            |            |            |            |            |            |            |            |
| 23                                                                                                | sp P31327 CPSM_HUM  | 82         | AADTIGYPV   | 8.72E+10   | 9.39E+10   | 1.04E+11   | 9.76E+10   | 8.82E+10   |            |            |            |            |            |            |            |            |            |            |
| 24                                                                                                | sp P13639 EF2_HUMAI | 66         | ALLELQLEPE  | 8.66E+10   | 9.15E+10   | 1.05E+11   | 9.90E+10   | 8.64E+10   |            |            |            |            |            |            |            |            |            |            |
| 25                                                                                                | sp Q06830 PRDX1_HUM | 17         | ADEGISFR;A  | 8.17E+10   | 8.94E+10   | 1.01E+11   | 9.51E+10   | 8.31E+10   |            |            |            |            |            |            |            |            |            |            |
| 26                                                                                                | sp Q15149 PLEC_HUM  | 255        | AAEEAEFEAR  | 8.09E+10   | 8.75E+10   | 1.02E+11   | 9.53E+10   | 8.45E+10   |            |            |            |            |            |            |            |            |            |            |
| 27                                                                                                | sp P62937 PPIA_HUMA | 10         | EGMNIVEAN   | 7.94E+10   | 8.68E+10   | 8.98E+10   | 8.94E+10   | 7.60E+10   |            |            |            |            |            |            |            |            |            |            |
| 28                                                                                                | sp P11142 HSP7C_HUM | 31         | ARFEELNADI  | 7.77E+10   | 8.67E+10   | 9.20E+10   | 9.11E+10   | 8.00E+10   |            |            |            |            |            |            |            |            |            |            |
| 29                                                                                                | sp P08670 VIME_HUM  | 37         | ARVEVER;DC  | 7.64E+10   | 8.41E+10   | 9.80E+10   | 8.87E+10   | 8.16E+10   |            |            |            |            |            |            |            |            |            |            |
| 30                                                                                                | sp P10809 CH60_HUM  | 44         | AAVEEGIVLG  | 7.65E+10   | 8.26E+10   | 9.21E+10   | 8.57E+10   | 7.38E+10   |            |            |            |            |            |            |            |            |            |            |
| 31                                                                                                | sp P0DPH7 TBA3C_HUM | 15         | AFVHWYVGI   | 8.22E+10   | 8.20E+10   | 9.34E+10   | 9.04E+10   | 8.11E+10   |            |            |            |            |            |            |            |            |            |            |
| 32                                                                                                | sp P08238 HS90B_HUM | 37         | ADHGEPIGR   | 7.09E+10   | 8.06E+10   | 8.34E+10   | 8.00E+10   | 7.17E+10   |            |            |            |            |            |            |            |            |            |            |
| 33                                                                                                | sp P08729 K2C7_HUM  | 30         | AEAEAWYQT   | 7.03E+10   | 7.90E+10   | 8.48E+10   | 8.24E+10   | 7.03E+10   |            |            |            |            |            |            |            |            |            |            |
| 34                                                                                                | sp P04075 ALDOA_HUM | 26         | AAQEYVKA    | 7.21E+10   | 7.85E+10   | 8.88E+10   | 8.53E+10   | 7.59E+10   |            |            |            |            |            |            |            |            |            |            |
| 35                                                                                                | sp A5A3E0 POTEF_HUM | 8          | AGFAGDDAP   | 7.58E+10   | 7.76E+10   | 8.38E+10   | 8.11E+10   | 7.26E+10   |            |            |            |            |            |            |            |            |            |            |

Calculate the sum of all intensities in each sample. Divide each intensity by this sum.

</



Calculate the average of the summed intensity for all samples (using the values calculated in step 2). Multiply each value by the average summed intensity. Repeat for all values in the data matrices.

AutoSave

OFF

Log<sub>2</sub> transform the data matrix.

quant\_all\_files\_DDA\_NCE27.elib\_unnormalized.proteins

Home

Insert

Draw

Page Layout

Formulas

Data

Review

View

Automate

Add-ins

Tell me

To visualize relative intensities across injections, you can copy and paste your matrix into a downstream tool, such as BoxplotR: <http://shiny.chemgrid.org/boxplotr/>

[illegible]

## Normalized intensities across DDA injections

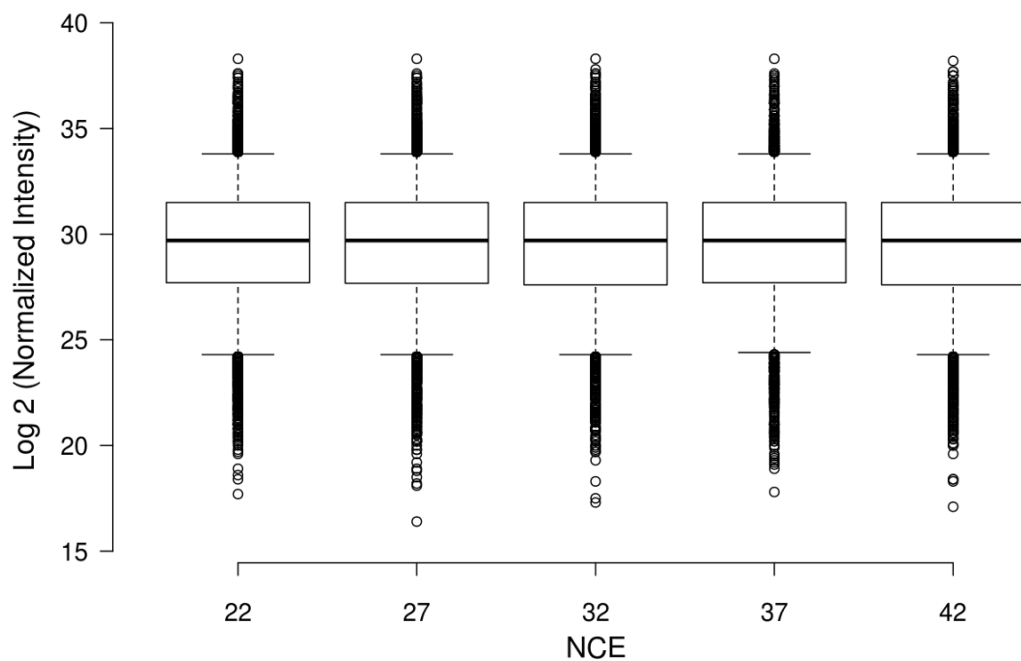

## 7. WALKTHROUGH WITH DEMO DATA

Tutorial for how to process data using Scribe and a ProSight generated library.

A. You can download data used in the Scribe manuscript from:

<https://massive.ucsd.edu/ProteoSAFe/dataset.jsp?task=99b781c9c0b84ac9bfc3f93734e9ddab>

To start, we recommend downloading the following files for this walkthrough:

- [2022\\_09\\_01\\_HeLa\\_500ng\\_16mzst\\_DDA\\_NCE\\_27.mzML](#)
- [Uniprot\\_human-reference\\_reviewed\\_2022mar02.fasta](#)
- [uniprot\\_human-reference\\_reviewed\\_2022mar02.prosight\\_input.trypsin\\_nce29\\_hcd2020.dlib](#)

B. Specify [[uniprot\\_human-reference\\_reviewed\\_2022mar02.prosight\\_input.trypsin\\_nce29\\_hcd2020.dlib](#)] as the library and [[uniprot\\_human-reference\\_reviewed\\_2022mar02.fasta](#)] as the background FASTA. The DLIB library was generated using the method explained in part 3 of the manual. We will use a “Normal Target/Decoy” approach, and select “Trypsin” as the enzyme. The fragmentation is set to CID/HCD (B/Y). Precursor mass tolerance, fragment mass tolerance, and library mass tolerance are all set at 10 PPM. The latest Percolator version should be selected, which at this time is v3-01. The settings should match the screenshot below.

| Parameters:                      |                                                                                                                                                       |
|----------------------------------|-------------------------------------------------------------------------------------------------------------------------------------------------------|
| Library:                         | <input type="text" value="uniprot_human-reference_reviewed_2022mar02.prosight_input.trypsin_nce29_hcd2020.dlib"/> <input type="button" value="Edit"/> |
| Background:                      | <input type="text" value="uniprot_human-reference_reviewed_2022mar02.fasta"/> <input type="button" value="Edit"/>                                     |
| Target/Decoy Approach:           | Normal Target/Decoy                                                                                                                                   |
| Enzyme:                          | Trypsin                                                                                                                                               |
| Fragmentation:                   | CID/HCD (B/Y)                                                                                                                                         |
| Precursor Mass Tolerance:        | 10.0 PPM                                                                                                                                              |
| Fragment Mass Tolerance:         | 10.0 PPM                                                                                                                                              |
| Library Mass Tolerance:          | 10.0 PPM                                                                                                                                              |
| Percolator Version:              | v3-01                                                                                                                                                 |
| Number of Cores:                 | 10                                                                                                                                                    |
| Additional Command Line Options: |                                                                                                                                                       |

C. Then queue up the [[2022\\_09\\_01\\_HeLa\\_500ng\\_16mzst\\_DDA\\_NCE\\_27.mzML](#)] mzML file by clicking the “Add MZML” button.”

| Jobs:                                             |                                                          |
|---------------------------------------------------|----------------------------------------------------------|
| <input type="button" value="Add MZML"/>           | <input type="button" value="Save Chromatogram Library"/> |
| <input type="button" value="Save Quant Reports"/> | <input type="button" value="Save BLIB"/>                 |
| File                                              | Progress                                                 |

Processing should begin immediately. Detailed analysis information will be printed in the console portion of the screen, and a blue bar will move across as the job is processed:

| File                                              | Progress                                                        |
|---------------------------------------------------|-----------------------------------------------------------------|
| Read 2022_09_01_HeLa_500ng_16mzst_DDA_NCE_27.mzML | #29.2 to 431.2 m/z (1272 MS/MS, 25905 total entries). Jobs in v |

Scribe will complete several steps in order: conversion of the mzML to DIA format, library search scoring, Percolator filtering, retention time alignment, Refined Percolator filtering, and then quantification. The resulting search should detect and quantify around 34,398 unique peptides, matching the manuscript result from Figure 3. The specific number may change by a small amount depending on your operating system because of sort ordering in Percolator.

D. Once the file for this library has concluded running, the file bar will turn green. Although there is only one file, and match-between-runs quantitation will not be performed, we can click “Save Quant Reports.”

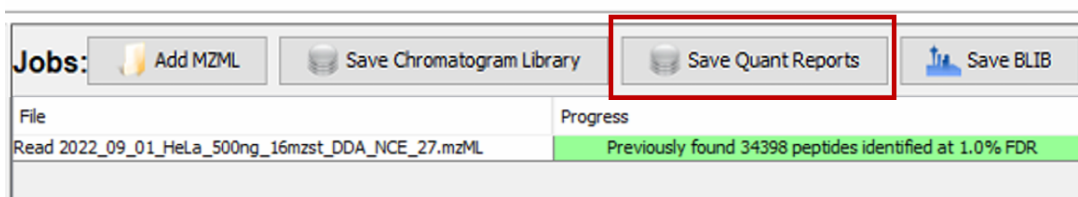

Once the quantitation has concluded, the screen will look the same as the screenshot below. At this point, you should exit from Scribe, and re-open a new window before running another search.

| File                                              | Progress                                               |
|---------------------------------------------------|--------------------------------------------------------|
| Read 2022_09_01_HeLa_500ng_16mzst_DDA_NCE_27.mzML | Previously found 34398 peptides identified at 1.0% FDR |
| Write Library quantreport_DDA_NCE27_trypsin.elib  | 34398 peptides identified at 1.0% FDR                  |

E. To process the other files found in the repository, consult the table below. DLIB Libraries are paired to HeLa mzMLs based on experimental NCE and Prosit NCE, where NCEs are tuned to the specific instrument. Here are the pairings for this experiment in Figure 3 and Figure 4:

| Experimental NCE | Experimental File (mzML)                     | Library File (DLIB)                                                                |
|------------------|----------------------------------------------|------------------------------------------------------------------------------------|
| 22               | 2022_09_01_HeLa_500ng_16mzst_DDA_NCE_22.mzML | uniprot_human-reference_reviewed_2022mar02.prosit_input.trypsin_nce16_hcd2020.dlib |
| 27               | 2022_09_01_HeLa_500ng_16mzst_DDA_NCE_27.mzML | uniprot_human-reference_reviewed_2022mar02.prosit_input.trypsin_nce29_hcd2020.dlib |
| 32               | 2022_09_01_HeLa_500ng_16mzst_DDA_NCE_32.mzML | uniprot_human-reference_reviewed_2022mar02.prosit_input.trypsin_nce34_hcd2020.dlib |
| 37               | 2022_09_01_HeLa_500ng_16mzst_DDA_NCE_37.mzML | uniprot_human-reference_reviewed_2022mar02.prosit_input.trypsin_nce41_hcd2020.dlib |
| 42               | 2022_09_01_HeLa_500ng_16mzst_DDA_NCE_42.mzML | uniprot_human-reference_reviewed_2022mar02.prosit_input.trypsin_nce50_hcd2020.dlib |

If you run into error messages or Scribe shuts down, please check your version of Java. Ideally, you will be using Java version 1.8. We know of errors that were introduced with Java versions 17 and 18 and we recommend using Java 16 or earlier to ensure stability.

F. Plot the number of peptides identified in each run in any downstream software (e.g., R or Excel). The resulting graph should be similar to the figure below.

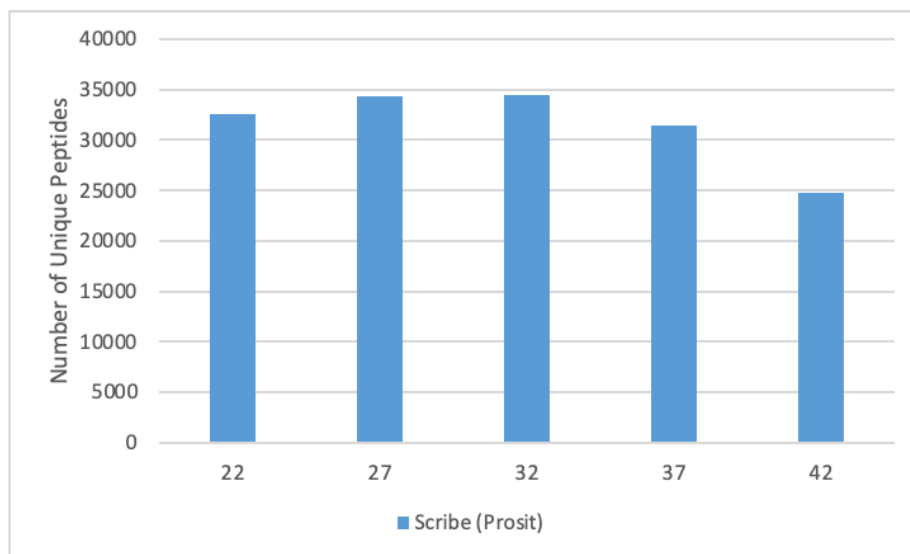



## 8. USING SCRIBE TO BUILD LIBRARIES FOR DIA SEARCHES

How to use spectral libraries made from DDA to search against DIA experiments

A spectral library, .DLIB, file is output from Scribe. With the latest version of EncyclopeDIA, you can use the acquired spectral library to search DIA injections. In this example, we are using the collision energy optimized library acquired from a HeLa DDA injection with NCE = 27. Open EncyclopeDIA, and upload “2022\_09\_01\_HeLa\_500ng\_16mzst\_DDA\_NCE\_27.DLIB.” Specify “uniprot\_human-reference\_reviewed\_2022mar02.fasta” as the background file. The settings should match the screenshot below.

EncyclopeDIA: Peptide Searching for DIA

File View Convert Data Help

EncyclopeDIA Thesaurus Walnut Scribe



### EncyclopeDIA: Library Searching Directly from Data-Independent Acquisition (DIA) MS/MS Data

EncyclopeDIA extracts peptide fragmentation chromatograms from MZML files, matches them to spectra in libraries, and calculates various scoring features. These features are interpreted by Percolator to identify peptides.

**Parameters:**

|                                      |                                                   |      |
|--------------------------------------|---------------------------------------------------|------|
| Library:                             | 2022_09_01_HeLa_500ng_16mzst_DDA_NCE_27.mzML.dlib | Edit |
| Background:                          | uniprot_human-reference_reviewed_2022mar02.fasta  | Edit |
| Target/Decoy Approach:               | Normal Target/Decoy                               | ▼    |
| Enzyme:                              | Trypsin                                           | ▼    |
| Fragmentation:                       | CID/HCD (B/Y)                                     | ▼    |
| Precursor Mass Tolerance:            | 10.0 PPM                                          | ▼    |
| Fragment Mass Tolerance:             | 10.0 PPM                                          | ▼    |
| Library Mass Tolerance:              | 10.0 PPM                                          | ▼    |
| Percolator Version:                  | v3-01                                             | ▼    |
| Number of Quantitative Ions:         | 5                                                 | ▲▼   |
| Minimum Number of Quantitative Ions: | 3                                                 | ▲▼   |
| Number of Cores:                     | 12                                                | ▲▼   |
| Additional Command Line Options:     |                                                   |      |

Click “Add mzML,” then find the DIA injection named  
 “2022\_09\_01\_HeLa\_500ng\_16mzst\_DIA\_01.mzML” to begin the search.

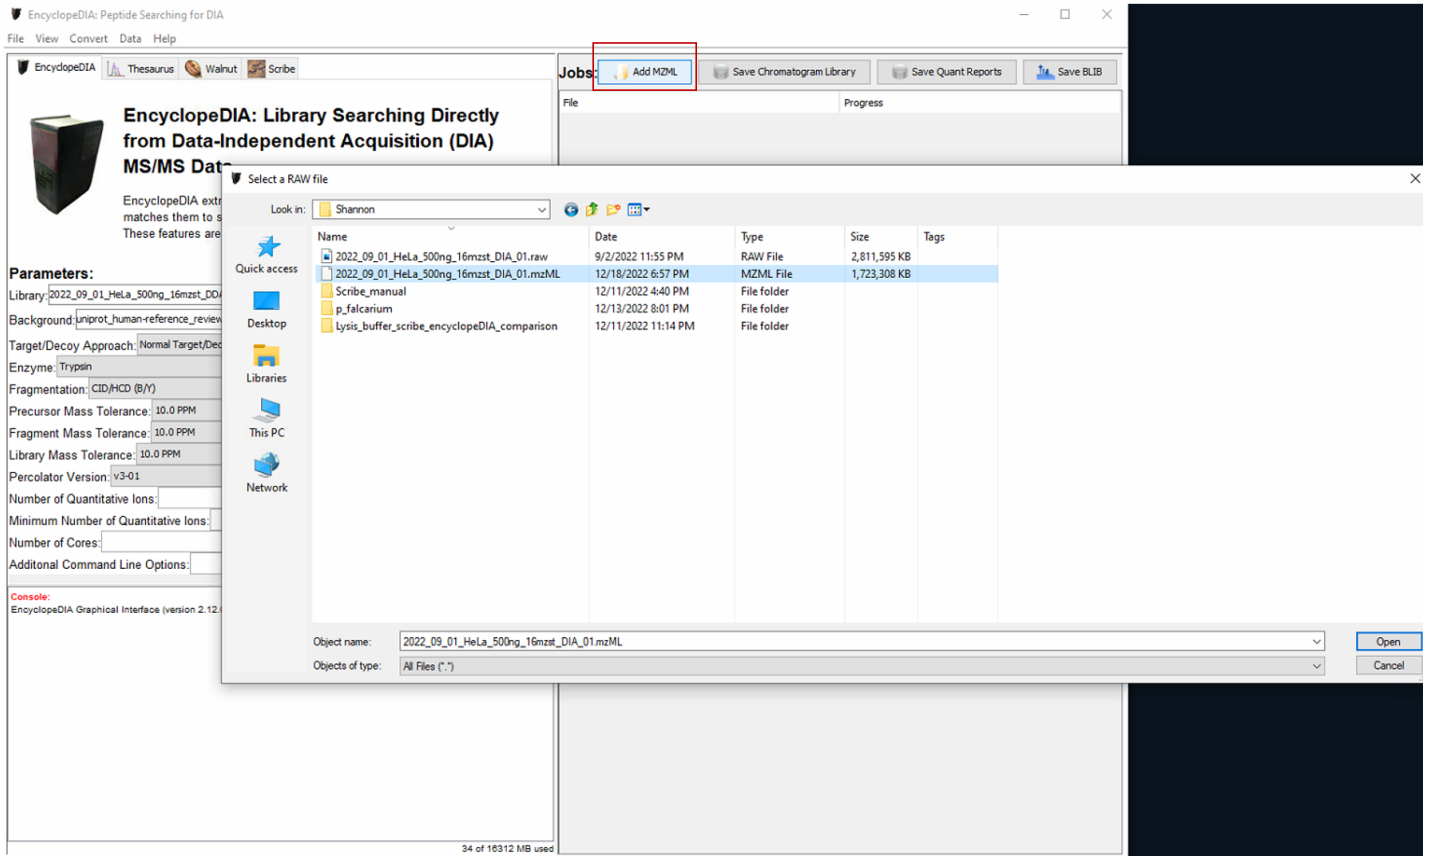

Once the search is complete, the detected number of peptides should be “31,349.”

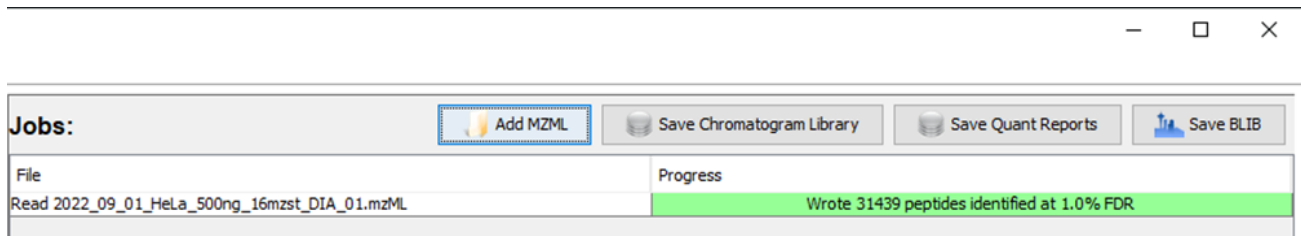

**ESI/MS Detection Browser**

**Parameters:**

Library: 2022\_09\_01\_Hela\_500mg\_16msat\_OSA\_01.ms4.mslib

Raw: 2022\_09\_01\_Hela\_500mg\_16msat\_OSA\_01.ms4.mslib

Reference: Please select file...

| #   | Precursor | Charge | Peptide     | Protein   | Retention | TIC    | Score |
|-----|-----------|--------|-------------|-----------|-----------|--------|-------|
| 91  | 406.201   | 2      | ZGTGAS...   | np0194... | 6.177     | 6.5769 | 0.012 |
| 92  | 571.309   | 2      | ZGTGAS...   | np0194... | 6.124     | 6.5149 | 0.82  |
| 93  | 467.365   | 2      | ZGTGAS...   | np0194... | 52.365    | 6.4869 | 0.038 |
| 94  | 454.266   | 2      | ZVLSVAVK... | np0273... | 38.587    | 4.4369 | 0.83  |
| 95  | 420.229   | 2      | ZVSVTVK...  | np0681... | 17.886    | 6.3969 | 0.010 |
| 96  | 446.352   | 2      | ZM415...    | np0643... | 49.976    | 6.3669 | 0.088 |
| 97  | 466.738   | 2      | ZLVGGGSR... | np0642... | 15.311    | 6.3569 | 0.088 |
| 98  | 739.648   | 2      | ZLVVAVK...  | np064...  | 79.154    | 3.3469 | 0.019 |
| 99  | 660.330   | 2      | ZACFAN...   | np0657... | 36.633    | 6.3269 | 0.014 |
| 100 | 594.827   | 2      | ZDPTKE...   | np0236... | 54.873    | 6.2769 | 0.089 |
| 101 | 446.767   | 2      | ZUHMDS...   | np0667... | 38.493    | 6.1269 | 0.036 |
| 102 | 436.125   | 2      | ZVLSVAVK... | np0273... | 38.587    | 4.4369 | 0.83  |
| 103 | 387.302   | 2      | ZLVGGGSR... | np0642... | 26.406    | 5.9169 | 0.016 |
| 104 | 744.354   | 2      | ZTPPSV...   | np060...  | 42.6      | 5.9169 | 0.011 |
| 105 | 468.914   | 2      | ZVTVVDS...  | np0681... | 46.391    | 5.9169 | 0.086 |
| 106 | 376.385   | 2      | ZBPTVY...   | np0646... | 41.4      | 5.9069 | 0.024 |
| 107 | 521.366   | 2      | ZVGGGSR...  | np0657... | 32.765    | 5.9069 | 0.031 |
| 108 | 599.265   | 2      | ZLVGGGSR... | np0642... | 38.71     | 5.8969 | 0.018 |
| 109 | 414.219   | 2      | ZFAPDVK...  | np055...  | 32.435    | 5.7969 | 0.016 |
| 110 | 444.213   | 2      | ZVLSVAVK... | np0273... | 38.587    | 4.4369 | 0.83  |
| 111 | 468.914   | 2      | ZVTVVDS...  | np0681... | 46.391    | 5.9169 | 0.086 |
| 112 | 472.842   | 2      | ZAGLEA...   | np0657... | 54.055    | 5.9169 | 0.015 |
| 113 | 533.223   | 2      | ZU415...    | np0274... | 18.454    | 5.9169 | 0.085 |
| 114 | 523.296   | 2      | ZLVGGGSR... | np0642... | 18.453    | 5.9169 | 0.085 |
| 115 | 583.79    | 2      | ZATARN...   | np0656... | 29.17     | 5.9169 | 0.016 |
| 116 | 444.213   | 2      | ZVLSVAVK... | np0273... | 38.587    | 4.4369 | 0.83  |
| 117 | 512.666   | 2      | ZVTVVDS...  | np0681... | 38.022    | 5.9169 | 0.087 |
| 118 | 622.472   | 2      | ZTPMKT...   | np0777... | 61.801    | 5.9169 | 0.012 |
| 119 | 739.84    | 2      | ZVSVTVK...  | np0681... | 77.531    | 5.9169 | 0.017 |
| 120 | 881.414   | 2      | ZAVVLS...   | np0643... | 62.326    | 5.9169 | 0.011 |
| 121 | 583.79    | 2      | ZATARN...   | np0656... | 29.172    | 5.9169 | 0.014 |
| 122 | 689.318   | 2      | ZVGGGSR...  | np0626... | 26.307    | 5.7969 | 0.062 |
| 123 | 540.289   | 2      | ZACQED...   | np065...  | 18.534    | 5.3269 | 0.011 |
| 124 | 1,804.45  | 2      | ZTGGGSR...  | np060...  | 24.406    | 5.3169 | 0.084 |
| 125 | 484.912   | 2      | ZAC15...    | np0655... | 75.799    | 5.3069 | 0.087 |
| 126 | 583.79    | 2      | ZATARN...   | np0656... | 29.172    | 5.3069 | 0.086 |
| 127 | 830.41    | 2      | ZALTPK...   | np0674... | 78.133    | 5.3269 | 0.011 |
| 128 | 540.272   | 2      | ZQLKEER...  | np0657... | 27.285    | 5.3069 | 0.81  |
| 129 | 639.794   | 2      | ZACQED...   | np065...  | 55.135    | 5.1969 | 0.015 |
| 130 | 623.461   | 2      | ZACQED...   | np065...  | 44.625    | 5.1969 | 0.086 |
| 131 | 569.263   | 2      | ZVBLQK...   | np0657... | 32.882    | 5.1669 | 0.086 |
| 132 | 615.303   | 2      | ZVGGGSR...  | np0643... | 68.387    | 5.1269 | 0.014 |
| 133 | 467.719   | 2      | ZACQED...   | np065...  | 24.791    | 5.1269 | 0.011 |
| 134 | 444.213   | 2      | ZVLSVAVK... | np0273... | 42.844    | 5.1269 | 0.023 |
| 135 | 472.84    | 2      | ZVGGGSR...  | np0643... | 21.266    | 5.1269 | 0.023 |
| 136 | 430.266   | 2      | ZTVVAVK...  | np0652... | 18.028    | 5.0969 | 0.82  |
| 137 | 611       |        |             |           |           |        |       |

## 9. FAQ

### A. Can multiple organisms be searched at once?

Yes, you can by generating a Prosit library for each organism using the method outlined in part 2, then using Encyclopedia/Scribe's "Combine Multiple Libraries" feature to merge both DLIBs. With this method, both organisms can be searched at once. The specified FASTA file contains both organisms. The "Combine Multiple Libraries" feature is outlined below:

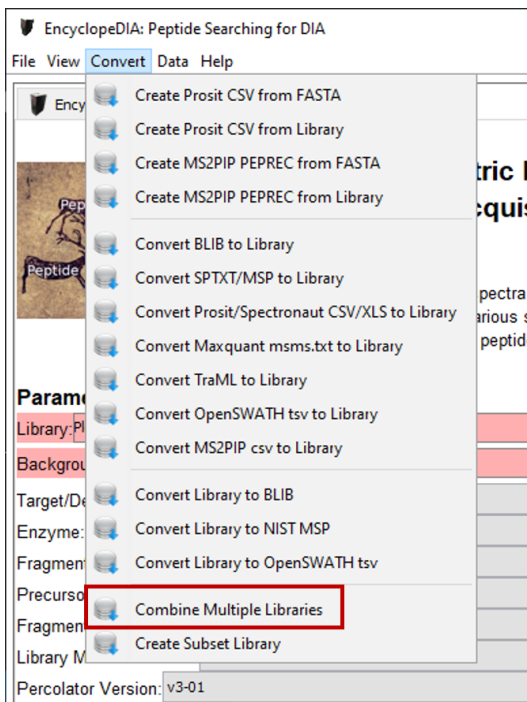

Click on "Add Files or Drag Into Box" to add files to the queue. Then select "Library" at the bottom of the window to name the merged library. Click okay to start the process.

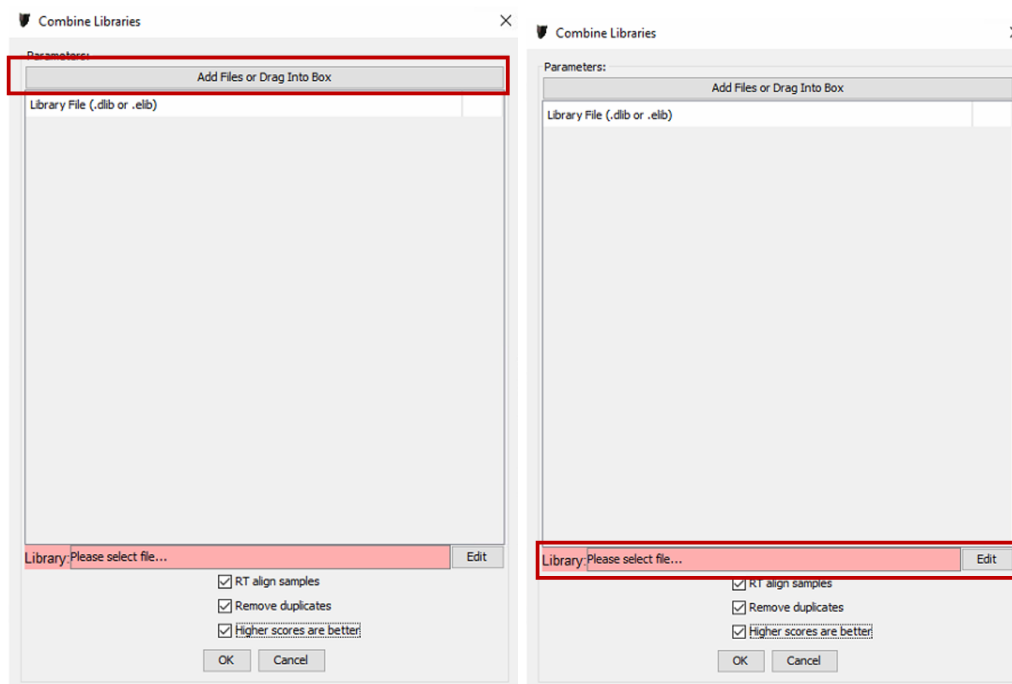

## B. When are additional decoys necessary?

Scribe can search for additional decoys as entrapment peptides by adjusting the “Target/Decoy Approach”. When doing this, Scribe adds additional entrapment peptides that are generated by shuffling the sequence of target peptides. Decoy entrapment peptides (reverse shuffled) are also added. If the percentage of detected entrapment peptides is higher than the filtered FDR percentage, then this can help indicate potential errors that escape target/decoy analysis performed by Percolator.

For more information on entrapment as a tool for estimating confidence in proteomics datasets, we recommend the following paper:

Granholm, V., Fernández Navarro, J., Noble, W.S., Käll, L.: Determining the calibration of confidence estimation procedures for unique peptides in shotgun proteomics. *J. Proteom.* 80, 123–131 (2013)
